# Supplementary material
Source: Elsevier journal article supplement (https://www.sciencedirect.com/science/article/pii/S0123901516300014)
Supplement: mmc1 [file S0123901516300014:mmc1.xlsx]

## Sheet: Tab Din
			Datos
descnivel	destipo	descricups	Promedio de Frecuencia	Promedio de % de uso	Suma de Costo unitario Sufic	Suma de Costo por evento Sufic	Suma de vrsoatcal2	Suma de vriss2
DIAGNOSTICO INICIAL			1.08	42.2468	2684526	749540	1.05597e+06	684008
ESTADIO 0 (IN SITU)	Estudio de extensión		1.33929	14.045	1161975	164171	308517	97970
	Hormonoterapia postmenopaúsicas		175.425	77.68	24943.1	120556	178184	64561.8
	Hormonoterapia premenopáusicas		123.643	51.8767	492943	90403.4	139205	49536
	Radioterapia		1	34.3367	10242042	4.74897e+06	4.8018e+06	4.8018e+06
	Seguimiento 1 año		1.8035	27.2815	1274719	460147	798594	331265
	Seguimiento 3 a 5 años		1.75222	22.8328	1203723	344596	603651	254736
	Tratamiento Quirúrgico		1.32538	39.0454	13918916	2.31861e+06	4.18871e+06	2.04977e+06
Total ESTADIO 0 (IN SITU)			9.83256	30.0283	2.83193e+07	8.24745e+06	1.10187e+07	7.64963e+06
ESTADIO I- IIA			20.0846	31.2023	6.33569e+07	5.11853e+07	8.03465e+07	4.54922e+07
ESTADIO IIB			22.4875	33.4494	6.3857e+07	5.46634e+07	9.11406e+07	4.89327e+07
ESTADIO IIIA-IIIC			21.3811	35.7246	6.59495e+07	6.31627e+07	1.02647e+08	5.33264e+07
ESTADIO IV	Cuidado paliativo		31.9495	21.0012	6.36461e+06	4.24746e+06	1.06798e+07	3.19852e+06
	Estudio de extensión		1.60571	42.5557	1363023	657458	1.25141e+06	476389
	Hormonoterapia postmenopaúsicas		236.878	37.6267	1.90685e+06	5.27521e+06	5.3497e+06	4.91707e+06
	Hormonoterapia premenopáusicas		95.155	47.6925	1.95756e+06	1.97157e+06	2.13685e+06	1.91819e+06
	Quimioterapia adyuvante	aprepitant	15.74	36.01	235193	1.33307e+06	1.33307e+06	1.33307e+06
		bevacizumab	13.33	12		0	0	0
		capecitabina	6.85	23.04	1062605	1.27355e+06	1.27355e+06	289234
		Capecitabina/Ixabepilona	6.31	12.82	7.84692e+06	5.10165e+06	5.10165e+06	4.67449e+06
		Ciclofosfamida/Metotrexate/Fluoracilo	6.31	12.98	617382	432591	453904	417194
		codeína	174.8	33.57	8733.33	484801	484801	484801
		CONSULTA PRIMERA VEZ MEDICINA ESPECIALIZADA (305)	11.44	96.98	24896	276209	362791	138792
		CREATININA EN SUERO, ORINA U OTROS	7.41	81.14	3840	23087.9	54713.5	18608.6
		dexametasona	11.61	96.25	2787.34	30854.7	52283.6	20999.2
		docetaxel	6.27	44.53	875758	2.09793e+06	4.67027e+06	508181
		Docetaxel/Capecitabina	8.32	19.08	1.66257e+06	2.24416e+06	2.24416e+06	1.15984e+06
		doxorubicina	5.5	10	1.16028e+07	4.73538e+06	5.69906e+06	2.76867e+06
		Doxorubicina/Ciclosfosfamida	4.95	41.82	940241	1.65501e+06	2.37693e+06	1.58515e+06
		Doxorubicina/Docetacel	5	10	1.508e+06	716298	1.25537e+06	465429
		Doxorubicina/Placlitaxel	6	10	1.1211e+06	605394	890195	577211
		ECOCARDIOGRAMA MODO M	1.71	30.85	149331	78777.3	73432.9	33345.5
		epirubicina	6	10		0	0	0
		Epirubicina/Ciclosfosfamida	4.33	7.83	1.00518e+06	301025	305423	300073
		Fluoracilo/Doxorubicina/Ciclosfosfamida	4.22	11.39	966867	384473	552976	361621
		Fluoracilo/Epirubicina/Ciclosfosfamida	5.14	11	1.02241e+06	429450	439355	422115
		GAMAGRAFIA OSEA (CORPORAL TOTAL O SEGMENTARIA)	3.01	89.6	150856	406853	655092	310488
		gemcitabina	6.57	23.41	1.50663e+06	1.7975e+06	1.7975e+06	1.5158e+06
		haloperidol	1	5	973.73	29.2119	29.2119	24.5367
		HEMOGRAMA IV [HEMOGLOBINA, HEMATOCRITO, RECUENTO DE ERITROCITOS,INDICES ERITROCITARIOS,LEUCOGRAMA,RECUENTO DE PLAQUETAS,INDICES PLAQUETARIOS Y MORFOLOGIA ELECTRONICA E HISTOGRAMA] METODO AUTOMATICO (233)	12	85.82	13218	136124	161685	113437
		ixabepilona	5.67	42.95	5.06517e+06	9.45727e+06	9.45727e+06	9.45727e+06
		lapatinib	157	17.4		0	0	0
		Lapatinib/Capecitabine	18	36.88	7.57423e+06	4.36889e+07	4.62868e+07	3.92749e+07
		metoclopramida	205.85	46.2	11591.9	1.08743e+06	4.04813e+06	399843
		morfina	421.23	41.43	1377	210294	210294	210294
		NITROGENO UREICO [BUN] *	10.06	31.25	4581	14401.5	23892.5	11521.8
		ondansetrón	12.49	72.65	4386.2	38984.4	177450	20941.1
		OSTEODENSITOMETRIA POR TAC	1.26	35.21	118064	52378.6	153945	47228.3
		paclitaxel	6.38	43.44	210600	503942	819708	466425
		paracetamol	798.97	66.04	180.641	94045.8	305855	82335.6
		Placlitaxel/Carboplatino	6.41	16.94	921761	792511	979471	758093
		RADIOGRAFIA DE TORAX (P.A.ó A.P.y LATERAL, DECUBITO LATERAL, OBLICUAS ó LATERAL CON BARIO)	1.45	64.02	34462	31990.7	42051.5	19178.5
		RESONANCIA NUCLEAR MAGNETICA DE BASE DE CRANEO-SILLA TURCA	1.35	16.7	603676	136099	366131	82522.6
		RESONANCIA NUCLEAR MAGNETICA DE COLUMNA CERVICAL SIMPLE	1.23	11.69	394954	56789.3	202380	52631.1
		RESONANCIA NUCLEAR MAGNETICA DE COLUMNA LUMBOSACRA SIMPLE	1.23	11.84	416691	60683.5	236506	53306.4
		RESONANCIA NUCLEAR MAGNETICA DE COLUMNA TORACICA SIMPLE	1.23	12	396157	58472.8	239702	54026.8
		TOMOGRAFIA AXIAL COMPUTADA DE ABDOMEN Y PELVIS (ABDOMEN TOTAL)	1.88	35.73	174298	117080	290924	89252
		TOMOGRAFIA AXIAL COMPUTADA DE COLUMNA SEGMENTOS CERVICAL, TORACICO, LUMBAR Y/O SACRO, COMPLEMENTO A MIELOGRAFIA (CADA SEGMENTO)	1.54	5.44	297150	24894	43530	22687.4
		TOMOGRAFIA AXIAL COMPUTADA DE CRANEO SIMPLE	1.17	8.55	117075	11711.6	31631.1	9707.9
		TOMOGRAFIA AXIAL COMPUTADA DE TORAX	2.07	37	129990	99559.3	252058	77348.2
		tramadol	284.02	26.28	1412.5	83204.9	182337	67878
		TRANSAMINASA GLUTÁMICO OXALACÉTICA O ASPARTATO AMINO TRANSFERASA [TGO-AST]	11.33	75.2	11900	101390	139731	38596.3
		TRANSAMINASA GLUTÁMICO PIRÚVICA O ALANINO AMINO TRANSFERASA [TGP-ALT]	11.26	72.03	12023	97513.5	133013	36740.9
		Transtuzumab Avanzado	12	23.52	6.13215e+06	1.58068e+07	1.58068e+07	1.53438e+07
		Trastuzumab/Lapatinib	4.64	4.82	7.68177e+06	1.49931e+06	1.84789e+06	1.48241e+06
		ULTRASONOGRAFIA DE HIGADO, PANCREAS, VIA BILIAR Y VESICULA	1.64	29.44	30237	14598.9	35487	12442.2
		ULTRASONOGRAFÍA DE ABDOMEN TOTAL : HIGADO, PANCREAS, VESICULA, VIAS BILIARES, RIÑONES, BAZO, GRANDES VASOS, PELVIS Y FLANCOS	1.74	64.94	59246	66945.4	165878	58237.9
		ULTRASONOGRAFIA DIAGNOSTICA DE MAMA, CON TRANSDUCTOR DE 7 MHZ O MAS	1.36	32.01	37698	16411.3	34696.3	12239.5
		ULTRASONOGRAFÍA PELVICA GINECOLOGICA TRANSABDOMINAL	1.59	22.65	21518	7749.38	21824.2	4993.27
		VENTRICULOGRAFIA NUCLEAR	1.36	14.87	110820	22411.4	51993.8	18437.5
		vinorelbina	6.86	20.14	710244	768241	768241	624504
		XEROMAMOGRAFIA O MAMOGRAFIA, BILATERAL	2.13	60.56	71195	91836.4	171302	94293.7
	Total Quimioterapia adyuvante		39.6407	32.8105	6.36849e+07	9.96581e+07	1.13765e+08	8.64826e+07
	Radioterapia		1	28.5433	14910637	4.87999e+06	5.09805e+06	5.05939e+06
	Rehabilitacion		2.30655	36.391	1.70973e+06	1.16081e+06	1.93931e+06	675101
	Seguimiento 1 año		2.69455	37.5527	1331125	866325	1.5792e+06	599921
	Seguimiento 3 a 5 años		2.49364	28.9655	1353687	655908	1.09561e+06	452263
	Tratamiento Quirúrgico		1.38852	35.9078	13936676	2.51849e+06	5.39442e+06	1.90765e+06
Total ESTADIO IV			24.7723	32.4726	1.08519e+08	1.21891e+08	1.4829e+08	1.05687e+08
RECAIDA LOCAL	Hormonoterapia postmenopaúsicas		239.133	37.845	1.90685e+06	4.87395e+06	5.10221e+06	4.47914e+06
	Hormonoterapia premenopáusicas		94.17	51.365	1.95756e+06	2.31425e+06	2.43702e+06	2.23549e+06
	Radioterapia		1	27.0317	14910637	4.88591e+06	5.07797e+06	5.03728e+06
	Recaida cirugia conservadora		1.25292	40.4567	12755945	2.34423e+06	7.59055e+06	2.23443e+06
	Recaida Mastectomia		1.30056	44.3939	7395908	992272	1.45933e+06	782853
	Rehabilitacion		2.40741	46.6667	1.54048e+06	988054	1.93717e+06	693476
Total RECAIDA LOCAL			22.776	42.6444	4.04674e+07	1.63987e+07	2.36042e+07	1.54627e+07
RECAIDA SISTEMICA	Hormonoterapia postmenopaúsicas		186.137	30.2467	1.90685e+06	4.03371e+06	4.19087e+06	3.74825e+06
	Hormonoterapia premenopáusicas		94.7725	32.6025	1.95756e+06	1.50571e+06	1.56217e+06	1.45935e+06
	Radioterapia		1	40.9425	8357042	3493774	3.74984e+06	3.67965e+06
	Recaida sistemica		10.25	24.0938	5.02757e+08	3.02311e+07	4.56243e+07	2.54959e+07
Total RECAIDA SISTEMICA			39.7372	27.1013	5.14979e+08	3.92643e+07	5.51272e+07	3.43832e+07
Total general			21.6709	33.632	8.88132e+08	3.55563e+08	5.1323e+08	3.11618e+08

## Sheet: Detalle del Costeo
				Datos
	Estadificación del Cáncer	Fase	Tratamiento	Promedio de Frecuencia	Promedio de % de uso	Suma de Costo unitario Sufic	Suma de Costo por evento Sufic
	ESTADIO 0 (IN SITU)	Diagnóstico Inicial	biopsia abierta escisional	1.01	2.66	160795	4319.92
			biopsia abierta incisional	1.01	2.93	160795	4758.41
			biopsia de mama con aguja tru -cut	1.04	35.96	121906	45590.9
			biopsia por bacaf guiada por ultrasonido	1.05	9.99	111045	11648.1
			biopsia por puncion con aguja fina de mama	1.06	9.71	122944	12654.1
			biopsia por tru - cut guiada por rnm	1.01	0.29	363600	1064.98
			biopsia por tru - cut guiada por ultrasonido	1.05	45.65	363600	174283
			consulta de primera vez por medicina general (414)	1.08	23.53	28557	7257.02
			consulta primera vez medicina especializada (305)	2.12526	100	24896	52910.5
			estudio de coloracion basica en biopsia (321)	1.05	100	33897	35591.8
			estudio de coloracion de inmunofluoresencia en biopsia	1.01	9.21	76137	7082.34
			inmunohistoquimica (her2)	1.01	89.15	56500	50873.4
			inmunohistoquimica (ki-67)	1.01	87.84	56500	50125.9
			inmunohistoquimica (re)	1.01	96.01	56500	54788.1
			inmunohistoquimica (rp)	1.01	96.01	56500	54788.1
			localizacion de lesion no palpable, de mama con arpon	1.05	10.23	141348	15182.9
			localizacion de lesion no palpable, de mama por estereotaxia	1.02	19.83	295300	59729.1
			resonancia nuclear magnetica de mama	1	5.1	295021	15046.1
			ultrasonografia diagnostica de mama, con transductor de 7 mhz o mas	1.04	64.12	37698	25138.8
			xeromamografia o mamografia, bilateral	1.09	85.96	71195	66707.2
		Total Diagnóstico Inicial					749540
		Estudio de extensión	consulta primera vez medicina especializada (305)	4.49375	100	24896	111876
			gamagrafia osea (corporal total o segmentaria)	1	14.45	150856	21798.7
			radiografia de columna cervical	1	0.23	31510	72.473
			radiografia de columna lumbosacra	1	0.56	39696	222.298
			radiografia de torax (p.a.ó a.p.y lateral, decubito lateral, oblicuas ó lateral con bario)	1	18.06	34462	6223.84
			resonancia nuclear magnetica de mama	1	6.55	295021	19323.9
			tomografia axial computada de abdomen y pelvis (abdomen total)	1	0.2	174298	348.596
			tomografia axial computada de craneo simple	1	0.2	117075	234.15
			tomografia axial computada de torax	1	0.23	129990	298.977
			ultrasonografia de higado, pancreas, via biliar y vesicula	1	11.2	30237	3386.54
			ultrasonografía de abdomen total : higado, pancreas, vesicula, vias biliares, riñones, bazo, grandes vasos, pelvis y flancos	1	0.65	59246	385.099
		Total Estudio de extensión					164171
		Tratamiento Quirúrgico	biopsia de glanglio centinela	1.04	29.34	668000	203831
			consulta primera vez medicina especializada (305)	4.76142	100	24896	118540
			creatinina en suero, orina u otros	1.04	90.86	3840	3628.58
			electrocardiograma de ritmo o de superficie sod	1	55	13635	7499.25
			glucosa en suero, lcr u otro fluido diferente a orina	1.04	90.07	6696	6272.33
			habitacion bipersonal	1	5.01	501398	25120
			hemograma iv [hemoglobina, hematocrito, recuento de eritrocitos,indices eritrocitarios,leucograma,recuento de plaquetas,indices plaquetarios y morfologia electronica e histograma] metodo automatico (233)	1.04	97.19	13218	13360.4
			insercion (subcutanea) (tejido blando) de expansor de tejidos [unico o multiple] ncoc	1.03	10.6	708038	77303.6
			localizacion de lesion no palpable, de mama con arpon	1	39.55	141348	55903.1
			localizacion de lesion no palpable, de mama por estereotaxia	1	40.7	295300	120187
			mamoplastia de reduccion sod	1.47	9.21	2453256	332139
			mastectomia simple unilateral sod	1.07	15.77	432187	72926.8
			mastectomia radical modificada unilateral	1.03	1.6	589883	9721.27
			mastectomia simple ampliada bilateral sod	1	5.42	671186	36378.3
			reconstruccion de mama con colgajo sod	1.07	20.96	1026680	230256
			reconstrucción de mama con prótesis sod	1.03	15.2	840690	131618
			reconstrucción del complejo areola, pezón (225)	1.5	5.3	523900	41650.1
			reseccion de cuadrante de mama sod	2.32	74.38	416016	717884
			reseccion local de lesión de mama sod (218)	1.02	7.91	270910	21857.6
			tiempo de protrombina [pt]	1	92.28	9299	8581.12
			tiempo de tromboplastina parcial [ptt]	1	92.28	11600	10704.5
			unidad de cuidados intensivos adulto	2.22	0.61	3264255	44204.5
			unidad de cuidados intermedios adulto	1.95	2.25	238810	10477.8
			vaciamiento radical linfatico axilar sod	1.01	2.47	744083	18562.6
		Total Tratamiento Quirúrgico					2.31861e+06
		Radioterapia	radioterapia conformal o conformacional	1	70.83	5665000	4.01252e+06
			teleterapia con acelerador lineal hasta 10 mv,pre o pop ganglionar de mama, campos multiples en: cara, encefalo, mama, torax, parcial de abdomen, pelvis o raquis, cuello, mediastino, ( grupo 4 ) con simulador y con planeacion computarizada ( tipo i)	1	16.09	4577042	736446
		Total Radioterapia					4.74897e+06
		Hormonoterapia premenopáusicas	consulta primera vez medicina especializada (305)	4.93	62.66	24896	76907.2
			ooforectomía bilateral por laparotomía	1	2.81	468000	0
			tamoxifeno	365	90.16	47.0639	13496.2
		Total Hormonoterapia premenopáusicas					90403.4
		Hormonoterapia postmenopaúsicas	consulta primera vez medicina especializada (305)	6.7	64.43	24896	107471
			tamoxifeno	344.15	90.93	47.0639	13084.3
		Total Hormonoterapia postmenopaúsicas					120556
		Seguimiento 1 año	consulta primera vez medicina especializada (305)	8.06147	100	24896	200698
			creatinina en suero, orina u otros	1.61	38.09	3840	2354.88
			gamagrafia osea (corporal total o segmentaria)	1	24.72	150856	37291.6
			hemograma iv [hemoglobina, hematocrito, recuento de eritrocitos,indices eritrocitarios,leucograma,recuento de plaquetas,indices plaquetarios y morfologia electronica e histograma] metodo automatico (233)	1.89	41.83	13218	10450
			nitrogeno ureico [bun] *	1.59	19.57	4581	1425.44
			radiografia de columna dorsolumbar	1	11.07	31300	3464.91
			radiografia de columna lumbosacra	1	11.07	39696	4394.35
			radiografia de torax (p.a.ó a.p.y lateral, decubito lateral, oblicuas ó lateral con bario)	1	30.41	34462	10479.9
			resonancia nuclear magnetica de mama	1.25	2.28	295021	8408.1
			tomografia axial computada de abdomen y pelvis (abdomen total)	1	7.62	174298	13281.5
			tomografia axial computada de craneo simple	1	6.26	117075	7328.9
			tomografia axial computada de torax	1	7.19	129990	9346.28
			transaminasa glutámico oxalacética o aspartato amino transferasa [tgo-ast]	1.54	17.3	11900	3170.4
			transaminasa glutámico pirúvica o alanino amino transferasa [tgp-alt]	1.54	17.3	12023	3203.17
			ultrasonografia de higado, pancreas, via biliar y vesicula	1	5.24	30237	1584.42
			ultrasonografía de abdomen total : higado, pancreas, vesicula, vias biliares, riñones, bazo, grandes vasos, pelvis y flancos	1	8.94	59246	5296.59
			ultrasonografia diagnostica de mama, con transductor de 7 mhz o mas	1.66	37.3	37698	23341.8
			xeromamografia o mamografia unilateral o de pieza quirurgica	2.24	93.74	54590	114627
		Total Seguimiento 1 año					460147
		Seguimiento 3 a 5 años	consulta primera vez medicina especializada (305)	6.58757	100	24896	164004
			creatinina en suero, orina u otros	1.28	31.75	3840	1560.58
			gamagrafia osea (corporal total o segmentaria)	1	2.65	150856	3997.68
			hemograma iv [hemoglobina, hematocrito, recuento de eritrocitos,indices eritrocitarios,leucograma,recuento de plaquetas,indices plaquetarios y morfologia electronica e histograma] metodo automatico (233)	1.38	35.96	13218	6559.41
			nitrogeno ureico [bun] *	1.46	12.24	4581	818.643
			radiografia de torax (p.a.ó a.p.y lateral, decubito lateral, oblicuas ó lateral con bario)	1	5.46	34462	1881.63
			resonancia nuclear magnetica de mama	1.19	2.68	295021	9408.81
			tomografia axial computada de abdomen y pelvis (abdomen total)	1	1.05	174298	1830.13
			tomografia axial computada de craneo simple	1	0.35	117075	409.762
			tomografia axial computada de torax	1	1.05	129990	1364.89
			transaminasa glutámico oxalacética o aspartato amino transferasa [tgo-ast]	1.69	13.9	11900	2795.43
			transaminasa glutámico pirúvica o alanino amino transferasa [tgp-alt]	1.69	13.9	12023	2824.32
			ultrasonografia de higado, pancreas, via biliar y vesicula	1	0.98	30237	296.323
			ultrasonografía de abdomen total : higado, pancreas, vesicula, vias biliares, riñones, bazo, grandes vasos, pelvis y flancos	1	3.51	59246	2079.53
			ultrasonografia diagnostica de mama, con transductor de 7 mhz o mas	2.13	31.24	37698	25084.7
			xeromamografia o mamografia unilateral o de pieza quirurgica	2.43	90.22	54590	119680
		Total Seguimiento 3 a 5 años					344596
	Total ESTADIO 0 (IN SITU)						8.99699e+06
	ESTADIO I- IIA	Diagnóstico Inicial	biopsia abierta escisional	1.01	2.66	160795	4319.92
			biopsia abierta incisional	1.01	2.93	160795	4758.41
			biopsia de mama con aguja tru -cut	1.04	35.96	121906	45590.9
			biopsia por bacaf guiada por ultrasonido	1.05	9.99	111045	11648.1
			biopsia por puncion con aguja fina de mama	1.06	9.71	122944	12654.1
			biopsia por tru - cut guiada por rnm	1.01	0.29	363600	1064.98
			biopsia por tru - cut guiada por ultrasonido	1.05	45.65	363600	174283
			consulta de primera vez por medicina general (414)	1.08	23.53	28557	7257.02
			consulta primera vez medicina especializada (305)	2.12526	100	24896	52910.5
			estudio de coloracion basica en biopsia (321)	1.05	100	33897	35591.8
			estudio de coloracion de inmunofluoresencia en biopsia	1.01	9.21	76137	7082.34
			inmunohistoquimica (her2)	1.01	89.15	56500	50873.4
			inmunohistoquimica (ki-67)	1.01	87.84	56500	50125.9
			inmunohistoquimica (re)	1.01	96.01	56500	54788.1
			inmunohistoquimica (rp)	1.01	96.01	56500	54788.1
			localizacion de lesion no palpable, de mama con arpon	1.05	10.23	141348	15182.9
			localizacion de lesion no palpable, de mama por estereotaxia	1.02	19.83	295300	59729.1
			resonancia nuclear magnetica de mama	1	5.1	295021	15046.1
			ultrasonografia diagnostica de mama, con transductor de 7 mhz o mas	1.04	64.12	37698	25138.8
			xeromamografia o mamografia, bilateral	1.09	85.96	71195	66707.2
		Total Diagnóstico Inicial					749540
		Estudio de extensión	consulta primera vez medicina especializada (305)	3.46041	100	24896	86150.4
			gamagrafia osea (corporal total o segmentaria)	1	95.43	150856	143962
			radiografia de torax (p.a.ó a.p.y lateral, decubito lateral, oblicuas ó lateral con bario)	1	96.68	34462	33317.9
			resonancia nuclear magnetica de mama	1	9.02	295021	26610.9
			tomografia axial computada de abdomen y pelvis (abdomen total)	1	6.05	174298	10545
			tomografia axial computada de columna segmentos cervical, toracico, lumbar y/o sacro, complemento a mielografia (cada segmento)	1	0.846667	297150	2515.87
			tomografia axial computada de craneo simple	1	1.12	117075	1311.24
			tomografia axial computada de torax	1	4.81	129990	6252.52
			ultrasonografia de higado, pancreas, via biliar y vesicula	1	57.15	30237	17280.4
			ultrasonografía de abdomen total : higado, pancreas, vesicula, vias biliares, riñones, bazo, grandes vasos, pelvis y flancos	1	39.92	59246	23651
		Total Estudio de extensión					351597
		Tratamiento Quirúrgico	biopsia de glanglio centinela	1.02	72.21	668000	492010
			consulta primera vez medicina especializada (305)	4.53282	100	24896	112849
			creatinina en suero, orina u otros	1	68.31	3840	2623.1
			electrocardiograma de ritmo o de superficie sod	1	56.3	13635	7676.5
			glucosa en suero, lcr u otro fluido diferente a orina	1	66.36	6696	4443.47
			habitacion bipersonal	1.17	21.72	501398	127417
			hemograma iv [hemoglobina, hematocrito, recuento de eritrocitos,indices eritrocitarios,leucograma,recuento de plaquetas,indices plaquetarios y morfologia electronica e histograma] metodo automatico (233)	1.04	84.53	13218	11620.1
			insercion (subcutanea) (tejido blando) de expansor de tejidos [unico o multiple] ncoc	1.06	8.44	708038	63343.9
			localizacion de lesion no palpable, de mama con arpon	1.03	26.09	141348	37984
			localizacion de lesion no palpable, de mama por estereotaxia	1.03	23.13	295300	70352
			mamoplastia de reduccion sod	1.46	6.83	2453256	244634
			mastectomia simple unilateral sod	1.04	25.49	432187	114571
			mastectomia radical bilateral sod	1.02	2.84	660864	19143.9
			mastectomia radical modificada unilateral	1.02	9.14	589883	54993.6
			mastectomia simple ampliada bilateral sod	1.02	5.73	671186	39228.1
			reconstruccion de mama con colgajo sod	1.08	19.75	1026680	218991
			reconstrucción de mama con prótesis sod	1.04	12.89	840690	112700
			reconstrucción del complejo areola, pezón (225)	1.49	3.78	523900	29507.1
			reseccion de cuadrante de mama sod	1.01	61.26	416016	257400
			reseccion local de lesión de mama sod (218)	1.03	3.75	270910	10463.9
			tiempo de protrombina [pt]	1	79.27	9299	7371.32
			tiempo de tromboplastina parcial [ptt]	1	79.27	11600	9195.32
			unidad de cuidados intensivos adulto	2.22	0.85	3264255	61596.5
			unidad de cuidados intermedios adulto	1.95	1	238810	4656.8
			vaciamiento radical linfatico axilar sod	1.01	13.36	744083	100404
		Total Tratamiento Quirúrgico					2.21517e+06
		Quimioterapia adyuvante	aprepitant	9.82	37.97	235193	876952
			ciclofosfamida/metotrexate/fluoracilo	6.18	14.7	617382	543255
			codeína	10.67	38.75	8733.33	34664.7
			consulta primera vez medicina especializada (305)	9.7	90.97	24896	219685
			creatinina en orina de 24 h	6.05	70.01	7953	33685.8
			dexametasona	9.62	90.17	2787.34	24178.4
			docetaxel	4.49	26.97	875758	1.01225e+06
			doxorubicina	6	50	1.16028e+07	6.95223e+06
			doxorubicina/ciclosfosfamida	3.83	55.24	940241	1.89557e+06
			doxorubicina/docetacel	7	47.5	1.508e+06	4.63803e+06
			doxorubicina/placlitaxel	7	64.94	1.1211e+06	4.84148e+06
			ecocardiograma modo m	1.57	26.33	149331	61730.6
			epirubicina	6	5		0
			epirubicina/ciclosfosfamida	4.33	10	1.00518e+06	406213
			fluoracilo/doxorubicina/ciclosfosfamida	4.82	15.35	966867	647039
			fluoracilo/epirubicina/ciclosfosfamida	4.86	8.57	1.02241e+06	380230
			gamagrafia osea (corporal total o segmentaria)	2.52	51.88	150856	197226
			hemograma iv [hemoglobina, hematocrito, recuento de eritrocitos,indices eritrocitarios,leucograma,recuento de plaquetas,indices plaquetarios y morfologia electronica e histograma] metodo automatico (233)	7.2	91.52	13218	87099.2
			metoclopramida	10.17	43.75	11591.9	51576.8
			morfina	270.83	30.47	1377	94428.7
			nitrogeno ureico [bun] *	5.09	18.19	4581	4241.42
			ondansetrón	8.73	90.56	4386.2	34676.8
			paclitaxel	4.25	56.07	210600	490662
			paracetamol	365	54.49	180.641	34357.4
			radiografia de torax (p.a.ó a.p.y lateral, decubito lateral, oblicuas ó lateral con bario)	1.69	45.59	34462	26552
			resonancia nuclear magnetica de base de craneo-silla turca	1.15	3.94	603676	27352.6
			resonancia nuclear magnetica de columna cervical simple	1	1.16	394954	4581.47
			resonancia nuclear magnetica de columna lumbosacra simple	1	1.16	416691	4833.62
			resonancia nuclear magnetica de columna toracica simple	1	1.16	396157	4595.42
			tomografia axial computada de abdomen y pelvis (abdomen total)	1.69	10.78	174298	31754
			tomografia axial computada de columna segmentos cervical, toracico, lumbar y/o sacro, complemento a mielografia (cada segmento)	1.66667	1.43	297150	7725.9
			tomografia axial computada de craneo simple	1.25	1.47	117075	2151.25
			tomografia axial computada de torax	1.69	10.78	129990	23681.8
			tramadol	283.57	25.55	1412.5	87980.4
			transaminasa glutámico oxalacética o aspartato amino transferasa [tgo-ast]	5.93	56.53	11900	39891.5
			transaminasa glutámico pirúvica o alanino amino transferasa [tgp-alt]	5.93	56.53	12023	40303.8
			transtuzumab temprano	18	18.1	5.55796e+06	1.72785e+07
			ultrasonografia de higado, pancreas, via biliar y vesicula	1.73	22.91	30237	11984.2
			ultrasonografía de abdomen total : higado, pancreas, vesicula, vias biliares, riñones, bazo, grandes vasos, pelvis y flancos	1.69	41.23	59246	41281.8
			ultrasonografia diagnostica de mama, con transductor de 7 mhz o mas	1.72	32.6	37698	21138
			ultrasonografía pelvica ginecologica transabdominal	1.53	19.34	21518	6367.22
			ventriculografia nuclear	1.56	13.12	110820	22681.8
			xeromamografia o mamografia, bilateral	1	61.81	71195	44005.6
		Total Quimioterapia adyuvante					4.12888e+07
		Radioterapia	braquiterapia intersticial con alta tasa de dosis (170)	1	1.58	1070136	16908.1
			radioterapia conformal o conformacional	1	49.47	5665000	2.80248e+06
			teleterapia con acelerador lineal hasta 10 mv,pre o pop ganglionar de mama, campos multiples en: cara, encefalo, mama, torax, parcial de abdomen, pelvis o raquis, cuello, mediastino, ( grupo 4 ) con simulador y con planeacion computarizada ( tipo i)	1	20.14	4577042	921816
			teleterapia utilizando cobalto pre o posoperatorio ganglionar de mama, campos multiples en: cara, encefalo, mama, torax, parcial de abdomen, pelvis o raquis, cuello, mediastino, ( grupo 4 ) con simulador y con planeacion computarizada ( tipo i)	1	9.46	1890000	178794
		Total Radioterapia					3.91999e+06
		Hormonoterapia premenopáusicas	consulta primera vez medicina especializada (305)	8.39	63.47	24896	132575
			goserelina	4.5	13.66	1.46461e+06	702862
			ooforectomía bilateral por laparotomía	1	4.94	468000	23119.2
			tamoxifeno	365	88.05	47.0639	13972.9
		Total Hormonoterapia premenopáusicas					872529
		Hormonoterapia postmenopaúsicas	anastrozol	365	17.69	576	33940.9
			consulta primera vez medicina especializada (305)	8.07	85.13	24896	171035
			exemestano	365	15.4	15687.5	773069
			letrozol	365	15.11	8852.1	441534
			tamoxifeno	365	81.93	47.0639	12541.5
		Total Hormonoterapia postmenopaúsicas					1.43212e+06
		Rehabilitacion	consulta de primera vez por psicologia	2.45	81.81	26499	53113.1
			consulta primera vez medicina especializada (305)	2.9732	100	24896	74020.8
			electromiografía en cada extremidad (uno o mas musculos)	1	18.57	59851	11114.3
			infiltracion intralesional con medicamento hasta de cinco lesiones	2	7.43	52543	7807.89
			lidocaína	2	50	10800	10800
			metilprednisolona	2	50	50893.3	50893.3
			neuroconduccion por cada extremidad (uno o mas nervios)	1	18.57	45840	8512.49
			potenciales evocados somatosensoriales (275)	1	7.43	100506	7467.6
			resonancia nuclear magnetica de miembro inferior sin incluir articulaciones	1	7.43	212888	15817.6
			terapia fisica integral sod (198) (295)	10	37.14	7785	28913.5
			terapia ocupacional integral sod (198) (296)	10	37.14	5950	22098.3
			ultrasonografía articular de hombro	1	18.57	32400	6016.68
		Total Rehabilitacion					296576
		Seguimiento 1 año	consulta primera vez medicina especializada (305)	9.59225	100	24896	238809
			creatinina en suero, orina u otros	1.36	18.61	3840	971.889
			gamagrafia osea (corporal total o segmentaria)	1	10.14	150856	15296.8
			hemograma iv [hemoglobina, hematocrito, recuento de eritrocitos,indices eritrocitarios,leucograma,recuento de plaquetas,indices plaquetarios y morfologia electronica e histograma] metodo automatico (233)	1.61	42.86	13218	9121.03
			nitrogeno ureico [bun] *	1.2	13.77	4581	756.964
			radiografia de columna cervical	1	11.07	31510	3488.16
			radiografia de columna dorsolumbar	1	12.31	31300	3853.03
			radiografia de columna lumbosacra	1	12.31	39696	4886.58
			radiografia de torax (p.a.ó a.p.y lateral, decubito lateral, oblicuas ó lateral con bario)	1	10.47	34462	3608.17
			resonancia nuclear magnetica de mama	1.07	4.42	295021	13952.7
			tomografia axial computada de abdomen y pelvis (abdomen total)	1	8.23	174298	14344.7
			tomografia axial computada de craneo simple	1	4.31	117075	5045.93
			tomografia axial computada de torax	1	5.24	129990	6811.48
			transaminasa glutámico oxalacética o aspartato amino transferasa [tgo-ast]	1.5	21.25	11900	3793.12
			transaminasa glutámico pirúvica o alanino amino transferasa [tgp-alt]	1.5	21.25	12023	3832.33
			ultrasonografia de higado, pancreas, via biliar y vesicula	1	4.82	30237	1457.42
			ultrasonografía de abdomen total : higado, pancreas, vesicula, vias biliares, riñones, bazo, grandes vasos, pelvis y flancos	1	8.52	59246	5047.76
			ultrasonografia diagnostica de mama, con transductor de 7 mhz o mas	2.09	35.74	37698	28159.1
			xeromamografia o mamografia unilateral o de pieza quirurgica	2.34	92.18	54590	117751
		Total Seguimiento 1 año					480987
		Seguimiento 3 a 5 años	consulta primera vez medicina especializada (305)	6.79275	100	24896	169112
			creatinina en suero, orina u otros	1.25	9.47	3840	454.56
			gamagrafia osea (corporal total o segmentaria)	1	2.89	150856	4359.74
			hemograma iv [hemoglobina, hematocrito, recuento de eritrocitos,indices eritrocitarios,leucograma,recuento de plaquetas,indices plaquetarios y morfologia electronica e histograma] metodo automatico (233)	1.42	16.49	13218	3095.1
			nitrogeno ureico [bun] *	1.25	9.47	4581	542.276
			radiografia de torax (p.a.ó a.p.y lateral, decubito lateral, oblicuas ó lateral con bario)	1	6.63	34462	2284.83
			resonancia nuclear magnetica de mama	1.18	2.38	295021	8285.37
			tomografia axial computada de abdomen y pelvis (abdomen total)	1	1.4	174298	2440.17
			tomografia axial computada de craneo simple	1	0.47	117075	550.252
			tomografia axial computada de torax	1	1.4	129990	1819.86
			transaminasa glutámico oxalacética o aspartato amino transferasa [tgo-ast]	1.31	16.96	11900	2643.89
			transaminasa glutámico pirúvica o alanino amino transferasa [tgp-alt]	1.31	16.96	12023	2671.22
			ultrasonografia de higado, pancreas, via biliar y vesicula	1	0.98	30237	296.323
			ultrasonografía de abdomen total : higado, pancreas, vesicula, vias biliares, riñones, bazo, grandes vasos, pelvis y flancos	1	4.68	59246	2772.71
			ultrasonografia diagnostica de mama, con transductor de 7 mhz o mas	1.91	29.65	37698	21348.9
			xeromamografia o mamografia unilateral o de pieza quirurgica	2.13	90.19	54590	104870
		Total Seguimiento 3 a 5 años					327548
	Total ESTADIO I- IIA						5.19349e+07
	ESTADIO IIB	Diagnóstico Inicial	biopsia abierta escisional	1.01	2.66	160795	4319.92
			biopsia abierta incisional	1.01	2.93	160795	4758.41
			biopsia de mama con aguja tru -cut	1.04	35.96	121906	45590.9
			biopsia por bacaf guiada por ultrasonido	1.05	9.99	111045	11648.1
			biopsia por puncion con aguja fina de mama	1.06	9.71	122944	12654.1
			biopsia por tru - cut guiada por rnm	1.01	0.29	363600	1064.98
			biopsia por tru - cut guiada por ultrasonido	1.05	45.65	363600	174283
			consulta de primera vez por medicina general (414)	1.08	23.53	28557	7257.02
			consulta primera vez medicina especializada (305)	2.12526	100	24896	52910.5
			estudio de coloracion basica en biopsia (321)	1.05	100	33897	35591.8
			estudio de coloracion de inmunofluoresencia en biopsia	1.01	9.21	76137	7082.34
			inmunohistoquimica (her2)	1.01	89.15	56500	50873.4
			inmunohistoquimica (ki-67)	1.01	87.84	56500	50125.9
			inmunohistoquimica (re)	1.01	96.01	56500	54788.1
			inmunohistoquimica (rp)	1.01	96.01	56500	54788.1
			localizacion de lesion no palpable, de mama con arpon	1.05	10.23	141348	15182.9
			localizacion de lesion no palpable, de mama por estereotaxia	1.02	19.83	295300	59729.1
			resonancia nuclear magnetica de mama	1	5.1	295021	15046.1
			ultrasonografia diagnostica de mama, con transductor de 7 mhz o mas	1.04	64.12	37698	25138.8
			xeromamografia o mamografia, bilateral	1.09	85.96	71195	66707.2
		Total Diagnóstico Inicial					749540
		Estudio de extensión	consulta primera vez medicina especializada (305)	4.10964	100	24896	102313
			gamagrafia osea (corporal total o segmentaria)	1	100	150856	150856
			radiografia de torax (p.a.ó a.p.y lateral, decubito lateral, oblicuas ó lateral con bario)	1	94.8	34462	32670
			resonancia nuclear magnetica de mama	1	14.04	295021	41420.9
			tomografia axial computada de abdomen y pelvis (abdomen total)	1	6.14	174298	10701.9
			tomografia axial computada de columna segmentos cervical, toracico, lumbar y/o sacro, complemento a mielografia (cada segmento)	1	0.81	297150	2406.91
			tomografia axial computada de craneo simple	1	1.51	117075	1767.83
			tomografia axial computada de torax	1	7.05	129990	9164.29
			ultrasonografia de higado, pancreas, via biliar y vesicula	1	57.55	30237	17401.4
			ultrasonografía de abdomen total : higado, pancreas, vesicula, vias biliares, riñones, bazo, grandes vasos, pelvis y flancos	1	44.41	59246	26311.1
		Total Estudio de extensión					395014
		Tratamiento Quirúrgico	biopsia de glanglio centinela	1.05	7.86	668000	55130
			consulta primera vez medicina especializada (305)	4.45973	100	24896	111029
			creatinina en suero, orina u otros	1.04	86.35	3840	3448.47
			electrocardiograma de ritmo o de superficie sod	1	59.69	13635	8138.73
			glucosa en suero, lcr u otro fluido diferente a orina	1	84.21	6696	5638.7
			habitacion bipersonal	1.17	55.64	501398	326404
			hemograma iv [hemoglobina, hematocrito, recuento de eritrocitos,indices eritrocitarios,leucograma,recuento de plaquetas,indices plaquetarios y morfologia electronica e histograma] metodo automatico (233)	1.11	91.47	13218	13420.5
			insercion (subcutanea) (tejido blando) de expansor de tejidos [unico o multiple] ncoc	1.02	11.41	708038	82402.9
			localizacion de lesion no palpable, de mama con arpon	1.01	4.35	141348	6210.12
			localizacion de lesion no palpable, de mama por estereotaxia	1.01	5.64	295300	16821.5
			mamoplastia de reduccion sod	1.15	4.19	2453256	118210
			mastectomia simple unilateral sod	1.01	5.54	432187	24182.6
			mastectomia radical bilateral sod	1.02	8.41	660864	56690.2
			mastectomia radical modificada unilateral	1.02	61.62	589883	370756
			mastectomia simple ampliada bilateral sod	1.01	4.93	671186	33420.4
			reconstruccion de mama con colgajo sod	1.02	42.21	1026680	442029
			reconstrucción de mama con prótesis sod	1.01	10.75	840690	91277.9
			reconstrucción del complejo areola, pezón (225)	1.03	1.84	523900	9928.95
			reseccion de cuadrante de mama sod	1.02	24.57	416016	104259
			reseccion local de lesión de mama sod (218)	1.04	2.13	270910	6001.2
			tiempo de protrombina [pt]	1	87.96	9299	8179.4
			tiempo de tromboplastina parcial [ptt]	1	87.96	11600	10203.4
			unidad de cuidados intensivos adulto	2.14	1.19	3264255	83127.5
			unidad de cuidados intermedios adulto	1.57	2.64	238810	9898.2
			vaciamiento radical linfatico axilar sod	1.11	82.75	744083	683459
		Total Tratamiento Quirúrgico					2.68027e+06
		Quimioterapia adyuvante	aprepitant	9.11	36.27	235193	777123
			ciclofosfamida/metotrexate/fluoracilo	6.18	9.7	617382	359992
			codeína	20	50	8733.33	86460
			consulta primera vez medicina especializada (305)	9.95	96.19	24896	238277
			creatinina en suero, orina u otros	5.15	81.24	3840	16066
			dexametasona	8.73	76.09	2787.34	18452.4
			docetaxel	4.3	31.21	875758	1.13463e+06
			doxorubicina	6	5	1.16028e+07	3.13276e+06
			doxorubicina/ciclosfosfamida	4.2	77.01	940241	2.7428e+06
			doxorubicina/docetacel	7	47.5	1.508e+06	4.63803e+06
			doxorubicina/placlitaxel	8	79.88	1.1211e+06	6.44785e+06
			ecocardiograma modo m	1.66	34.84	149331	86364.7
			epirubicina	6	10		0
			epirubicina/ciclosfosfamida	4.8	6.5	1.00518e+06	302954
			fluoracilo/doxorubicina/ciclosfosfamida	4.92	13.45	966867	585366
			fluoracilo/epirubicina/ciclosfosfamida	4.57	11.71	1.02241e+06	515899
			gamagrafia osea (corporal total o segmentaria)	1.14	70.9	150856	121931
			hemograma iv [hemoglobina, hematocrito, recuento de eritrocitos,indices eritrocitarios,leucograma,recuento de plaquetas,indices plaquetarios y morfologia electronica e histograma] metodo automatico (233)	9.81	87.92	13218	114005
			metoclopramida	14.86	57.78	11591.9	98106.2
			morfina	182.12	30.47	1377	65172.2
			nitrogeno ureico [bun] *	4.87	22.26	4581	4966.09
			ondansetrón	6.42	73.32	4386.2	20601.1
			paclitaxel	4.25	71.81	210600	626152
			paracetamol	898.2	51.5	180.641	81027.8
			radiografia de torax (p.a.ó a.p.y lateral, decubito lateral, oblicuas ó lateral con bario)	1.2	46.85	34462	19374.5
			resonancia nuclear magnetica de base de craneo-silla turca	1.2	1.62	603676	11735.5
			resonancia nuclear magnetica de columna cervical simple	1.17	1.3	394954	6007.25
			resonancia nuclear magnetica de columna lumbosacra simple	1.17	1.46	416691	7117.92
			resonancia nuclear magnetica de columna toracica simple	1.17	1.3	396157	6025.55
			tomografia axial computada de abdomen y pelvis (abdomen total)	1.15	11.51	174298	23071
			tomografia axial computada de columna segmentos cervical, toracico, lumbar y/o sacro, complemento a mielografia (cada segmento)	1.25	1.61	297150	5980.14
			tomografia axial computada de craneo simple	1	1.24	117075	1451.73
			tomografia axial computada de torax	1.645	6.66	259980	24259.3
			tramadol	287.83	21.93	1412.5	74598.9
			transaminasa glutámico oxalacética o aspartato amino transferasa [tgo-ast]	5.8	65.76	11900	45387.6
			transaminasa glutámico pirúvica o alanino amino transferasa [tgp-alt]	5.8	65.76	12023	45856.7
			transtuzumab temprano	18	21.66	5.55796e+06	2.13465e+07
			ultrasonografia de higado, pancreas, via biliar y vesicula	2.12	21.68	30237	13897.4
			ultrasonografía de abdomen total : higado, pancreas, vesicula, vias biliares, riñones, bazo, grandes vasos, pelvis y flancos	1.46	44.15	59246	38189.4
			ultrasonografia diagnostica de mama, con transductor de 7 mhz o mas	1.67	45.12	37698	28405.6
			ultrasonografía pelvica ginecologica transabdominal	1.44	5.9	21518	1828.17
			ventriculografia nuclear	1.46	18.84	110820	30482.6
			xeromamografia o mamografia, bilateral	1.67	54.6	71195	64917
		Total Quimioterapia adyuvante					4.40101e+07
		Radioterapia	radioterapia conformal o conformacional	1	60.48	5665000	3426192
			teleterapia con acelerador lineal hasta 10 mv,pre o pop ganglionar de mama, campos multiples en: cara, encefalo, mama, torax, parcial de abdomen, pelvis o raquis, cuello, mediastino, ( grupo 4 ) con simulador y con planeacion computarizada ( tipo i)	1	21.355	4577042	977427
			teleterapia utilizando cobalto pre o posoperatorio ganglionar de mama, campos multiples en: cara, encefalo, mama, torax, parcial de abdomen, pelvis o raquis, cuello, mediastino, ( grupo 4 ) con simulador y con planeacion computarizada ( tipo i)	1	7.255	3780000	274239
		Total Radioterapia					4.67786e+06
		Hormonoterapia premenopáusicas	consulta primera vez medicina especializada (305)	8.5	66.34	24896	140386
			goserelina	4.5	9.33	1.46461e+06	470965
			ooforectomía bilateral por laparotomía	1	4.92	468000	23025.6
			tamoxifeno	365	93.33	47.0639	13683.8
		Total Hormonoterapia premenopáusicas					648061
		Hormonoterapia postmenopaúsicas	anastrozol	328.96	18.18	576	25098.5
			consulta primera vez medicina especializada (305)	8.15	80.67	24896	163681
			exemestano	335.69	13.83	15687.5	547905
			letrozol	321.38	14.26	8852.1	295620
			tamoxifeno	347.05	78.45	47.0639	10958.2
		Total Hormonoterapia postmenopaúsicas					1.04326e+06
		Rehabilitacion	consulta de primera vez por psicologia	3.36	100	26499	89036.6
			consulta primera vez medicina especializada (305)	5.047	100	24896	125650
			dexametasona	2	30	7271.34	4362.8
			electromiografía en cada extremidad (uno o mas musculos)	1	22.7	59851	13586.2
			infiltracion intralesional con medicamento hasta de cinco lesiones	2	13.62	52543	14312.7
			lidocaína	2	10	10800	2160
			metilprednisolona	2	20	50893.3	20357.3
			neuroconduccion por cada extremidad (uno o mas nervios)	1	22.7	45840	10405.7
			potenciales evocados somatosensoriales (275)	1	4.54	100506	4562.97
			resonancia nuclear magnetica de miembro inferior sin incluir articulaciones	1	9.08	212888	19330.2
			terapia fisica integral sod (198) (295)	9.63	100	7785	74969.6
			terapia ocupacional integral sod (198) (296)	5.09	100	5950	30285.5
			ultrasonografía articular de hombro	1	22.7	32400	7354.8
		Total Rehabilitacion					416375
		Seguimiento 1 año	consulta primera vez medicina especializada (305)	19.0099	100	24896	473270
			creatinina en suero, orina u otros	1.23	18.625	7680	1759.39
			gamagrafia osea (corporal total o segmentaria)	1	3.395	301712	10243.1
			hemograma iv [hemoglobina, hematocrito, recuento de eritrocitos,indices eritrocitarios,leucograma,recuento de plaquetas,indices plaquetarios y morfologia electronica e histograma] metodo automatico (233)	1.345	18.13	26436	7154.12
			nitrogeno ureico [bun] *	1.2	16.985	9162	1862.22
			radiografia de columna dorsolumbar	1	8.1	31300	2535.3
			radiografia de columna lumbosacra	1	40.48	39696	16068.9
			radiografia de torax (p.a.ó a.p.y lateral, decubito lateral, oblicuas ó lateral con bario)	1.13	7.605	68924	5835.73
			resonancia nuclear magnetica de mama	1.14	4.685	590042	31312.1
			tomografia axial computada de abdomen y pelvis (abdomen total)	1	1.4	174298	2440.17
			tomografia axial computada de craneo simple	1	0.47	117075	550.252
			tomografia axial computada de torax	1	1.4	129990	1819.86
			transaminasa glutámico oxalacética o aspartato amino transferasa [tgo-ast]	1.235	19.79	23800	6183.78
			transaminasa glutámico pirúvica o alanino amino transferasa [tgp-alt]	1.235	19.79	24046	6247.69
			ultrasonografia de higado, pancreas, via biliar y vesicula	1	1.695	60474	1025.03
			ultrasonografía de abdomen total : higado, pancreas, vesicula, vias biliares, riñones, bazo, grandes vasos, pelvis y flancos	1	3.04	118492	3602.16
			ultrasonografia diagnostica de mama, con transductor de 7 mhz o mas	2.04	30.475	75396	46830.6
			xeromamografia o mamografia unilateral o de pieza quirurgica	1.905	83.675	109180	173715
		Total Seguimiento 1 año					792455
	Total ESTADIO IIB						5.54129e+07
	ESTADIO IIIA-IIIC	Diagnóstico Inicial	biopsia abierta escisional	1.01	2.66	160795	4319.92
			biopsia abierta incisional	1.01	2.93	160795	4758.41
			biopsia de mama con aguja tru -cut	1.04	35.96	121906	45590.9
			biopsia por bacaf guiada por ultrasonido	1.05	9.99	111045	11648.1
			biopsia por puncion con aguja fina de mama	1.06	9.71	122944	12654.1
			biopsia por tru - cut guiada por rnm	1.01	0.29	363600	1064.98
			biopsia por tru - cut guiada por ultrasonido	1.05	45.65	363600	174283
			consulta de primera vez por medicina general (414)	1.08	23.53	28557	7257.02
			consulta primera vez medicina especializada (305)	2.12526	100	24896	52910.5
			estudio de coloracion basica en biopsia (321)	1.05	100	33897	35591.8
			estudio de coloracion de inmunofluoresencia en biopsia	1.01	9.21	76137	7082.34
			inmunohistoquimica (her2)	1.01	89.15	56500	50873.4
			inmunohistoquimica (ki-67)	1.01	87.84	56500	50125.9
			inmunohistoquimica (re)	1.01	96.01	56500	54788.1
			inmunohistoquimica (rp)	1.01	96.01	56500	54788.1
			localizacion de lesion no palpable, de mama con arpon	1.05	10.23	141348	15182.9
			localizacion de lesion no palpable, de mama por estereotaxia	1.02	19.83	295300	59729.1
			resonancia nuclear magnetica de mama	1	5.1	295021	15046.1
			ultrasonografia diagnostica de mama, con transductor de 7 mhz o mas	1.04	64.12	37698	25138.8
			xeromamografia o mamografia, bilateral	1.09	85.96	71195	66707.2
		Total Diagnóstico Inicial					749540
		Estudio de extensión	consulta primera vez medicina especializada (305)	4.67329	100	24896	116346
			gamagrafia osea (corporal total o segmentaria)	1	100	150856	150856
			radiografia de torax (p.a.ó a.p.y lateral, decubito lateral, oblicuas ó lateral con bario)	1.04	95.05	34462	34066.4
			resonancia nuclear magnetica de mama	1.05	9.41	295021	29149.5
			tomografia axial computada de abdomen y pelvis (abdomen total)	1	16.06	174298	27992.3
			tomografia axial computada de columna segmentos cervical, toracico, lumbar y/o sacro, complemento a mielografia (cada segmento)	1	1.67667	297150	4982.22
			tomografia axial computada de craneo simple	1	2.83	117075	3313.22
			tomografia axial computada de torax	1	14.88	129990	19342.5
			ultrasonografia de higado, pancreas, via biliar y vesicula	1.04	55.95	30237	17594.3
			ultrasonografía de abdomen total : higado, pancreas, vesicula, vias biliares, riñones, bazo, grandes vasos, pelvis y flancos	1.08	47.76	59246	30559.6
		Total Estudio de extensión					434202
		Tratamiento Quirúrgico	biopsia de glanglio centinela	1.02	6.45	668000	43947.7
			consulta primera vez medicina especializada (305)	5.47284	100	24896	136252
			creatinina en suero, orina u otros	1	95.31	3840	3659.9
			electrocardiograma de ritmo o de superficie sod	1	61.56	13635	8393.71
			glucosa en suero, lcr u otro fluido diferente a orina	1	93.35	6696	6250.72
			habitacion bipersonal	1.32	53.55	501398	354418
			hemograma iv [hemoglobina, hematocrito, recuento de eritrocitos,indices eritrocitarios,leucograma,recuento de plaquetas,indices plaquetarios y morfologia electronica e histograma] metodo automatico (233)	1.07	100	13218	14143.3
			insercion (subcutanea) (tejido blando) de expansor de tejidos [unico o multiple] ncoc	1.02	13.05	708038	94246.9
			localizacion de lesion no palpable, de mama con arpon	1.01	6.1	141348	8708.45
			localizacion de lesion no palpable, de mama por estereotaxia	1.01	5.12	295300	15270.6
			mamoplastia de reduccion sod	1.07	3.52	2453256	92399.4
			mastectomia simple unilateral sod	1.01	4.57	432187	19948.5
			mastectomia radical bilateral sod	1.01	9.45	660864	63076.2
			mastectomia radical modificada unilateral	1.02	75.54	589883	454510
			mastectomia simple ampliada bilateral sod	1.01	4.49	671186	30437.6
			reconstruccion de mama con colgajo sod	1.02	56.88	1026680	595655
			reconstrucción de mama con prótesis sod	1.02	11.72	840690	100499
			reconstrucción del complejo areola, pezón (225)	1.05	1.76	523900	9681.67
			reseccion de cuadrante de mama sod	1.02	15.94	416016	67639.2
			reseccion local de lesión de mama sod (218)	1.03	0.39	270910	1088.25
			tiempo de protrombina [pt]	1	92.98	9299	8646.21
			tiempo de tromboplastina parcial [ptt]	1	92.98	11600	10785.7
			unidad de cuidados intensivos adulto	2.18	1.41	3264255	100337
			unidad de cuidados intermedios adulto	1.8	2.96	238810	12723.8
			vaciamiento radical linfatico axilar sod	1.02	90.39	744083	686028
		Total Tratamiento Quirúrgico					2.93875e+06
		Quimioterapia adyuvante	aprepitant	9.48	36.62	235193	815346
			ciclofosfamida/metotrexate/fluoracilo	5.23	9.47	617382	298622
			codeína	20	55	8733.33	95106
			consulta primera vez medicina especializada (305)	8.98	96.51	24896	215764
			creatinina en suero, orina u otros	6.14	84.64	3840	19956.1
			dexametasona	9.55	97.52	2787.34	25746.1
			docetaxel	4.67	40.56	875758	1.55382e+06
			doxorubicina	7.045	19.76	1.16028e+07	9.7076e+06
			doxorubicina/ciclosfosfamida	4.2	72.93	940241	2.70894e+06
			doxorubicina/docetacel	5.64	72.7	1.508e+06	5.93031e+06
			doxorubicina/placlitaxel	6.18	87.59	1.1211e+06	5.73724e+06
			ecocardiograma modo m	1.66	33.76	149331	83687.5
			epirubicina	6	5		0
			epirubicina/ciclosfosfamida	4.8	5.4	1.00518e+06	245431
			fluoracilo/doxorubicina/ciclosfosfamida	4.82	17.22	966867	746328
			fluoracilo/epirubicina/ciclosfosfamida	4.5	14	1.02241e+06	598258
			gamagrafia osea (corporal total o segmentaria)	1.87	78.71	150856	222041
			hemograma iv [hemoglobina, hematocrito, recuento de eritrocitos,indices eritrocitarios,leucograma,recuento de plaquetas,indices plaquetarios y morfologia electronica e histograma] metodo automatico (233)	8.8	95.96	13218	111619
			metoclopramida	11.88	53	11591.9	71892.6
			morfina	182.12	35.01	1377	74882.8
			nitrogeno ureico [bun] *	5.15	25.43	4581	5999.48
			ondansetrón	9.91	95.39	4386.2	41160.7
			paclitaxel	4.25	70.67	210600	472627
			paracetamol	895.3	64.94	180.641	99827.3
			placlitaxel/carboplatino	6	20	921761	0
			radiografia de torax (p.a.ó a.p.y lateral, decubito lateral, oblicuas ó lateral con bario)	2.07	56.71	34462	40454.8
			resonancia nuclear magnetica de base de craneo-silla turca	1.99	13.22	603676	158814
			resonancia nuclear magnetica de columna cervical simple	1.39	5.19	394954	28492.4
			resonancia nuclear magnetica de columna lumbosacra simple	1.17	4.03	416691	19647.4
			resonancia nuclear magnetica de columna toracica simple	1.17	1.02	396157	4727.74
			tomografia axial computada de columna segmentos cervical, toracico, lumbar y/o sacro, complemento a mielografia (cada segmento)	1.735	4.7625	396200	55562
			tomografia axial computada de craneo simple	1.15	1.48	117075	1992.62
			tomografia axial computada de pelvis	1.04	19.26	117461	23527.9
			tomografia axial computada de torax	1.04	18.94	129990	25604.9
			tramadol	272.4	36.17	1412.5	111377
			transaminasa glutámico oxalacética o aspartato amino transferasa [tgo-ast]	7.17	61.31	11900	52311.5
			transaminasa glutámico pirúvica o alanino amino transferasa [tgp-alt]	7.36	75.84	12023	67110.3
			transtuzumab temprano	18	20.42	5.55796e+06	2.01122e+07
			ultrasonografia de higado, pancreas, via biliar y vesicula	1.97	31.64	30237	18847
			ultrasonografía de abdomen total : higado, pancreas, vesicula, vias biliares, riñones, bazo, grandes vasos, pelvis y flancos	1.35	44.35	59246	35472.1
			ultrasonografia diagnostica de mama, con transductor de 7 mhz o mas	1.4	38.19	37698	20155.6
			ultrasonografía pelvica ginecologica transabdominal	1.98	4.63	21518	1972.64
			ventriculografia nuclear	1.92	19.47	110820	41427.2
			xeromamografia o mamografia, bilateral	1.98	52.59	71195	74134.1
		Total Quimioterapia adyuvante					5.0776e+07
		Radioterapia	braquiterapia intersticial con alta tasa de dosis (170)	1	0.84	1070136	8989.14
			radioterapia conformal o conformacional	1	59.68	5665000	3380872
			teleterapia con acelerador lineal hasta 10 mv,pre o pop ganglionar de mama, campos multiples en: cara, encefalo, mama, torax, parcial de abdomen, pelvis o raquis, cuello, mediastino, ( grupo 4 ) con simulador y con planeacion computarizada ( tipo i)	1	25.76	4577042	1.17905e+06
			teleterapia utilizando cobalto pre o posoperatorio ganglionar de mama, campos multiples en: cara, encefalo, mama, torax, parcial de abdomen, pelvis o raquis, cuello, mediastino, ( grupo 4 ) con simulador y con planeacion computarizada ( tipo i)	1	9.29	3780000	351162
		Total Radioterapia					4.92007e+06
		Hormonoterapia premenopáusicas	consulta primera vez medicina especializada (305)	7.98	77.18	24896	153334
			goserelina	4.5	11.15	1.46461e+06	580547
			ooforectomía bilateral por laparotomía	1	8.19	468000	38329.2
			tamoxifeno	365	90.35	47.0639	12875.9
		Total Hormonoterapia premenopáusicas					785086
		Hormonoterapia postmenopaúsicas	anastrozol	236.79	24.15	576	26545.1
			consulta primera vez medicina especializada (305)	39.36	89.38	24896	875840
			exemestano	328.03	16.17	15687.5	652536
			letrozol	319.3	19.34	8852.1	440592
			tamoxifeno	302.68	74.39	47.0639	9208.85
		Total Hormonoterapia postmenopaúsicas					2.00472e+06
		Rehabilitacion	consulta de primera vez por psicologia	3.91	100	26499	103611
			consulta primera vez medicina especializada (305)	5.3178	100	24896	132392
			dexametasona	2	20	7271.34	2908.54
			electromiografía en cada extremidad (uno o mas musculos)	1	22.7	59851	13586.2
			infiltracion intralesional con medicamento hasta de cinco lesiones	2	13.62	52543	14312.7
			metilprednisolona	2	10	50893.3	10178.7
			neuroconduccion por cada extremidad (uno o mas nervios)	1	22.7	45840	10405.7
			potenciales evocados somatosensoriales (275)	1	4.54	100506	4562.97
			resonancia nuclear magnetica de miembro inferior sin incluir articulaciones	1	22.7	212888	48325.6
			terapia fisica integral sod (198) (295)	10.17	100	7785	79173.4
			terapia ocupacional integral sod (198) (296)	5.63	100	5950	33498.5
			ultrasonografía articular de hombro	1	13.62	32400	4412.88
		Total Rehabilitacion					457368
		Seguimiento 1 año	consulta primera vez medicina especializada (305)	12.3254	100	24896	306854
			creatinina en suero, orina u otros	2.44	23.09	3840	2163.44
			gamagrafia osea (corporal total o segmentaria)	1	4.84	150856	7301.43
			hemograma iv [hemoglobina, hematocrito, recuento de eritrocitos,indices eritrocitarios,leucograma,recuento de plaquetas,indices plaquetarios y morfologia electronica e histograma] metodo automatico (233)	2.9	26.83	13218	10284.5
			nitrogeno ureico [bun] *	2.57	22.15	4581	2607.76
			radiografia de torax (p.a.ó a.p.y lateral, decubito lateral, oblicuas ó lateral con bario)	1	8.58	34462	2956.84
			resonancia nuclear magnetica de mama	1.08	2.02	295021	6436.18
			tomografia axial computada de abdomen y pelvis (abdomen total)	1	7.93	174298	13821.8
			tomografia axial computada de craneo simple	1	0.47	117075	550.252
			tomografia axial computada de torax	1	1.4	129990	1819.86
			transaminasa glutámico oxalacética o aspartato amino transferasa [tgo-ast]	2.55	27.3	11900	8284.19
			transaminasa glutámico pirúvica o alanino amino transferasa [tgp-alt]	2.55	27.3	12023	8369.81
			ultrasonografia de higado, pancreas, via biliar y vesicula	1	1.95	30237	589.621
			ultrasonografía de abdomen total : higado, pancreas, vesicula, vias biliares, riñones, bazo, grandes vasos, pelvis y flancos	1	4.68	59246	2772.71
			ultrasonografia diagnostica de mama, con transductor de 7 mhz o mas	1.92	32.35	37698	23415
			xeromamografia o mamografia unilateral o de pieza quirurgica	1.84	92.97	54590	93384.3
		Total Seguimiento 1 año					491611
		Seguimiento 3 a 5 años	consulta primera vez medicina especializada (305)	7.8505	100	24896	195446
			creatinina en suero, orina u otros	1.8	12.76	3840	881.971
			gamagrafia osea (corporal total o segmentaria)	1	2.89	150856	4359.74
			hemograma iv [hemoglobina, hematocrito, recuento de eritrocitos,indices eritrocitarios,leucograma,recuento de plaquetas,indices plaquetarios y morfologia electronica e histograma] metodo automatico (233)	1.85	17.44	13218	4264.66
			nitrogeno ureico [bun] *	1.8	12.76	4581	1052.16
			radiografia de columna dorsolumbar	1	8.1	31300	2535.3
			radiografia de columna lumbosacra	1	40.48	39696	16068.9
			radiografia de torax (p.a.ó a.p.y lateral, decubito lateral, oblicuas ó lateral con bario)	1	6.63	34462	2284.83
			resonancia nuclear magnetica de mama	1.15	5.8	295021	19677.9
			tomografia axial computada de abdomen y pelvis (abdomen total)	2	3.13	174298	10911.1
			transaminasa glutámico oxalacética o aspartato amino transferasa [tgo-ast]	1.73	20.25	11900	4168.87
			transaminasa glutámico pirúvica o alanino amino transferasa [tgp-alt]	1.73	20.25	12023	4211.96
			ultrasonografia de higado, pancreas, via biliar y vesicula	1	1.44	30237	435.413
			ultrasonografía de abdomen total : higado, pancreas, vesicula, vias biliares, riñones, bazo, grandes vasos, pelvis y flancos	1	1.4	59246	829.444
			ultrasonografia diagnostica de mama, con transductor de 7 mhz o mas	2	25.79	37698	19444.6
			xeromamografia o mamografia unilateral o de pieza quirurgica	1.77	70.64	54590	68255.4
		Total Seguimiento 3 a 5 años					354828
	Total ESTADIO IIIA-IIIC						6.39122e+07
	ESTADIO IV	Diagnóstico Inicial	biopsia abierta escisional	1.01	2.66	160795	4319.92
			biopsia abierta incisional	1.01	2.93	160795	4758.41
			biopsia de mama con aguja tru -cut	1.04	35.96	121906	45590.9
			biopsia por bacaf guiada por ultrasonido	1.05	9.99	111045	11648.1
			biopsia por puncion con aguja fina de mama	1.06	9.71	122944	12654.1
			biopsia por tru - cut guiada por rnm	1.01	0.29	363600	1064.98
			biopsia por tru - cut guiada por ultrasonido	1.05	45.65	363600	174283
			consulta de primera vez por medicina general (414)	1.08	23.53	28557	7257.02
			consulta primera vez medicina especializada (305)	2.12526	100	24896	52910.5
			estudio de coloracion basica en biopsia (321)	1.05	100	33897	35591.8
			estudio de coloracion de inmunofluoresencia en biopsia	1.01	9.21	76137	7082.34
			inmunohistoquimica (her2)	1.01	89.15	56500	50873.4
			inmunohistoquimica (ki-67)	1.01	87.84	56500	50125.9
			inmunohistoquimica (re)	1.01	96.01	56500	54788.1
			inmunohistoquimica (rp)	1.01	96.01	56500	54788.1
			localizacion de lesion no palpable, de mama con arpon	1.05	10.23	141348	15182.9
			localizacion de lesion no palpable, de mama por estereotaxia	1.02	19.83	295300	59729.1
			resonancia nuclear magnetica de mama	1	5.1	295021	15046.1
			ultrasonografia diagnostica de mama, con transductor de 7 mhz o mas	1.04	64.12	37698	25138.8
			xeromamografia o mamografia, bilateral	1.09	85.96	71195	66707.2
		Total Diagnóstico Inicial					749540
		Estudio de extensión	consulta primera vez medicina especializada (305)	5.23397	100	24896	130305
			gamagrafia osea (corporal total o segmentaria)	1.46	100	150856	220250
			radiografia de torax (p.a.ó a.p.y lateral, decubito lateral, oblicuas ó lateral con bario)	1.55	82.89	34462	44276.6
			resonancia nuclear magnetica de mama	1	4.51	295021	13305.4
			tomografia axial computada de abdomen y pelvis (abdomen total)	1.04	38.55	174298	69879.6
			tomografia axial computada de columna segmentos cervical, toracico, lumbar y/o sacro, complemento a mielografia (cada segmento)	1.39	10.7467	297150	44387.9
			tomografia axial computada de craneo simple	1.2	18.5	117075	25990.7
			tomografia axial computada de torax	1.09	41.59	129990	58928.5
			ultrasonografia de higado, pancreas, via biliar y vesicula	1.14	42.34	30237	14594.7
			ultrasonografía de abdomen total : higado, pancreas, vesicula, vias biliares, riñones, bazo, grandes vasos, pelvis y flancos	1.25	47.99	59246	35540.2
		Total Estudio de extensión					657458
		Tratamiento Quirúrgico	consulta primera vez medicina especializada (305)	4.18344	100	24896	104151
			creatinina en suero, orina u otros	1.07	100	3840	4108.8
			electrocardiograma de ritmo o de superficie sod	1	60.92	13635	8306.44
			glucosa en suero, lcr u otro fluido diferente a orina	1	99.22	6696	6643.77
			habitacion bipersonal	1.93	58.5	501398	566103
			hemograma iv [hemoglobina, hematocrito, recuento de eritrocitos,indices eritrocitarios,leucograma,recuento de plaquetas,indices plaquetarios y morfologia electronica e histograma] metodo automatico (233)	1.07	100	13218	14143.3
			insercion (subcutanea) (tejido blando) de expansor de tejidos [unico o multiple] ncoc	1.02	3.71	708038	26793.6
			localizacion de lesion no palpable, de mama con arpon	1.03	0.51	141348	742.501
			localizacion de lesion no palpable, de mama por estereotaxia	1.03	0.51	295300	1551.21
			mamoplastia de reduccion sod	1.04	0.35	2453256	8929.85
			mastectomia simple unilateral sod	1.01	3.63	432187	15845.3
			mastectomia radical bilateral sod	1.01	8.42	660864	56201.2
			mastectomia radical modificada unilateral	1.02	49.41	589883	297290
			mastectomia simple ampliada bilateral sod	1.01	5.08	671186	34437.2
			reconstruccion de mama con colgajo sod	1.01	14.26	1026680	147869
			reconstrucción de mama con prótesis sod	1.02	3.87	840690	33185.4
			reconstrucción del complejo areola, pezón (225)	1.04	0.35	523900	1907
			reseccion de cuadrante de mama sod	1.01	4.45	416016	18697.8
			reseccion local de lesión de mama sod (218)	1.01	1.52	270910	4159.01
			tiempo de protrombina [pt]	1	96.49	9299	8972.61
			tiempo de tromboplastina parcial [ptt]	1	96.49	11600	11192.8
			unidad de cuidados intensivos adulto	4.18	3.16	3264255	431169
			unidad de cuidados intermedios adulto	3.59	5.51	238810	47238.8
			vaciamiento radical linfatico axilar sod	1.22	73.68	744083	668853
		Total Tratamiento Quirúrgico					2.51849e+06
		Quimioterapia adyuvante	aprepitant	15.74	36.01	235193	1.33307e+06
			bevacizumab	13.33	12		0
			capecitabina	6.85	23.04	1062605	1.93397e+06
			capecitabina/ixabepilona	6.31	12.82	7.84692e+06	5.38825e+06
			ciclofosfamida/metotrexate/fluoracilo	6.31	12.98	617382	432591
			codeína	174.8	33.57	8733.33	484801
			consulta primera vez medicina especializada (305)	11.44	96.98	24896	276209
			creatinina en suero, orina u otros	7.41	81.14	3840	23087.9
			dexametasona	11.61	96.25	2787.34	30854.7
			docetaxel	6.27	44.53	875758	2.09793e+06
			docetaxel/capecitabina	8.32	19.08	1.66257e+06	4.77109e+06
			doxorubicina	5.5	10	1.16028e+07	4.73538e+06
			doxorubicina/ciclosfosfamida	4.95	41.82	940241	1.65501e+06
			doxorubicina/docetacel	5	10	1.508e+06	716298
			doxorubicina/placlitaxel	6	10	1.1211e+06	605394
			ecocardiograma modo m	1.71	30.85	149331	78777.3
			epirubicina	6	10		0
			epirubicina/ciclosfosfamida	4.33	7.83	1.00518e+06	301025
			fluoracilo/doxorubicina/ciclosfosfamida	4.22	11.39	966867	384473
			fluoracilo/epirubicina/ciclosfosfamida	5.14	11	1.02241e+06	429450
			gamagrafia osea (corporal total o segmentaria)	3.01	89.6	150856	406853
			gemcitabina	6.57	23.41	1.50663e+06	2.82806e+06
			haloperidol	1	5	973.73	37.0629
			hemograma iv [hemoglobina, hematocrito, recuento de eritrocitos,indices eritrocitarios,leucograma,recuento de plaquetas,indices plaquetarios y morfologia electronica e histograma] metodo automatico (233)	12	85.82	13218	136124
			ixabepilona	5.67	42.95	5.06517e+06	1.32069e+07
			lapatinib	157	17.4		0
			lapatinib/capecitabine	18	36.88	7.57423e+06	4.36889e+07
			metoclopramida	205.85	46.2	11591.9	1.08743e+06
			morfina	421.23	41.43	1377	210294
			nitrogeno ureico [bun] *	10.06	31.25	4581	14401.5
			ondansetrón	12.49	72.65	4386.2	38984.4
			osteodensitometria por tac	1.26	35.21	118064	52378.6
			paclitaxel	6.38	43.44	210600	503942
			paracetamol	798.97	66.04	180.641	94045.8
			placlitaxel/carboplatino	6.41	16.94	921761	792511
			radiografia de torax (p.a.ó a.p.y lateral, decubito lateral, oblicuas ó lateral con bario)	1.45	64.02	34462	31990.7
			resonancia nuclear magnetica de base de craneo-silla turca	1.35	16.7	603676	136099
			resonancia nuclear magnetica de columna cervical simple	1.23	11.69	394954	56789.3
			resonancia nuclear magnetica de columna lumbosacra simple	1.23	11.84	416691	60683.5
			resonancia nuclear magnetica de columna toracica simple	1.23	12	396157	58472.8
			tomografia axial computada de abdomen y pelvis (abdomen total)	1.88	35.73	174298	117080
			tomografia axial computada de columna segmentos cervical, toracico, lumbar y/o sacro, complemento a mielografia (cada segmento)	1.54	5.44	297150	24894
			tomografia axial computada de craneo simple	1.17	8.55	117075	11711.6
			tomografia axial computada de torax	2.07	37	129990	99559.3
			tramadol	284.02	26.28	1412.5	83204.9
			transaminasa glutámico oxalacética o aspartato amino transferasa [tgo-ast]	11.33	75.2	11900	101390
			transaminasa glutámico pirúvica o alanino amino transferasa [tgp-alt]	11.26	72.03	12023	97513.5
			transtuzumab avanzado	12	23.52	6.13215e+06	2.83856e+07
			trastuzumab/lapatinib	4.64	4.82	7.68177e+06	1.48241e+06
			ultrasonografia de higado, pancreas, via biliar y vesicula	1.64	29.44	30237	14598.9
			ultrasonografía de abdomen total : higado, pancreas, vesicula, vias biliares, riñones, bazo, grandes vasos, pelvis y flancos	1.74	64.94	59246	66945.4
			ultrasonografia diagnostica de mama, con transductor de 7 mhz o mas	1.36	32.01	37698	16411.3
			ultrasonografía pelvica ginecologica transabdominal	1.59	22.65	21518	7749.38
			ventriculografia nuclear	1.36	14.87	110820	22411.4
			vinorelbina	6.86	20.14	710244	1.1505e+06
			xeromamografia o mamografia, bilateral	2.13	60.56	71195	91836.4
		Total Quimioterapia adyuvante					1.20856e+08
		Radioterapia	braquiterapia intracavitaria con baja tasa de dosis (170)	1	1.09	888595	9685.69
			radioterapia conformal o conformacional	1	33.05	5665000	1.87228e+06
			teleterapia con acelerador lineal hasta 10 mv,pre o pop ganglionar de mama, campos multiples en: cara, encefalo, mama, torax, parcial de abdomen, pelvis o raquis, cuello, mediastino, ( grupo 4 ) con simulador y con planeacion computarizada ( tipo i)	1	50.995	4577042	2.33406e+06
			teleterapia utilizando cobalto pre o posoperatorio ganglionar de mama, campos multiples en: cara, encefalo, mama, torax, parcial de abdomen, pelvis o raquis, cuello, mediastino, ( grupo 4 ) con simulador y con planeacion computarizada ( tipo i)	1	17.565	3780000	663957
		Total Radioterapia					4.87999e+06
		Hormonoterapia premenopáusicas	consulta primera vez medicina especializada (305)	8.39	78.4	24896	163760
			goserelina	7.55	18.06	1.46461e+06	1.68391e+06
			ooforectomía bilateral por laparotomía	1	24.06	468000	112601
			tamoxifeno	363.68	70.25	47.0639	11297.9
		Total Hormonoterapia premenopáusicas					1.97157e+06
		Hormonoterapia postmenopaúsicas	anastrozol	346.06	29.1	576	48364.7
			consulta primera vez medicina especializada (305)	8.83	87.88	24896	193188
			exemestano	347.78	31.04	15687.5	1.40677e+06
			fulvestrant	12	15	1.85679e+06	2.99013e+06
			letrozol	350.67	28.16	8852.1	763206
			tamoxifeno	355.93	34.58	47.0639	5410.91
		Total Hormonoterapia postmenopaúsicas					5.40708e+06
		Cuidado paliativo	analgesia post operatoria, por paciente	1	17.47	250775	43810.4
			atención mensual domiciliaria paciente crónico y/o terminal, con tratamiento definido.	10.055	36.345	207720	758431
			bloqueo de plejo braquial (65)	1	4.85	75355	3654.72
			bloqueo del simpatico presacro ( ganglio impar de walter) (65)	1	0.59	241314	1423.75
			bloqueo paracervical bilateral (65)	1	1.78	88095	1568.09
			buprenorfina	61.27	8.82	12077.6	91826.9
			consulta de control o de seguimiento por enfermeria	14.31	40.95	20000	117199
			consulta de primera vez por medicina general (414)	4.13	43.41	28557	51197.9
			consulta de primera vez por psicologia	6.23	56.69	26499	93588.8
			consulta de primera vez por trabajo social (306)	4.13	17.36	17000	12188.5
			consulta primera vez medicina especializada (305)	14.2068	100	24896	353692
			fentanilo	93.71	15.04	6848.23	202447
			habitacion bipersonal	5.85	22.63	501398	663778
			hidromorfona	75.72	11.59	3832	33629.4
			insercion de bomba de infusion totalmente implantable	1.34	1.96	102943	2703.69
			insercion de cateter subaracnoideo en canal espinal con puerta de entrada implantable para infusion de sustancia terapeutica o paliativa	1	1.18	571574	6744.57
			insercion de cateter subdermico (epidermoclisis)	10.35	26.49	30935	84815
			inyeccion de anestesia en nervio de faceta articular vertebral con fines analgesicos sod	1	1.45	155052	2248.25
			lidocaína	46.98	21.46	10800	108885
			metadona	80.28	11.04	6444	57112.6
			monoquimioterapia (ciclo de tratamiento) (278)	5	7.27	221962	80683.2
			morfina	232.83	45.12	2637	289316
			morfina, combinaciones	172.22	53.4	2637	253273
			neurolisis de plejo toracico (30)	1	0.15	1005924	1508.89
			oxicodona	148.94	36.69	106.315	206762
			paracetamol	178.52	44.29	180.641	46450
			radiografia de abdomen simple	1	0.64	29475	188.64
			radiografia de craneo simple	1	3.84	33109	1271.39
			radiografia de torax (p.a.ó a.p.y lateral, decubito lateral, oblicuas ó lateral con bario)	1	13.49	34462	4648.92
			radiografias comparativas de extremidades inferiores (54)	1	1.08	18460	199.368
			resonancia nuclear magnetica de cerebro	1	5.97	380000	22686
			resonancia nuclear magnetica de mama	1	2.1	295021	6195.44
			resonancia nuclear magnetica de torax proyecciones pa y lateral	1	2.1	399420	8387.82
			tomografia axial computada de abdomen y pelvis (abdomen total)	1.61	25.42	174298	71333.5
			tomografia axial computada de craneo simple	1	10.53	117075	12328
			tomografia axial computada de miembros inferiores y articulaciones	1	1.08	99102	1070.3
			tomografia axial computada de torax	1	16.2	129990	21058.4
			tramadol	109.17	22.4	1412.5	75694.4
			tratamiento mensual integral de pacientes con enfermedad cerebro-vascular, trauma cráneo-encefálico, trauma raquimedular o enfermedad degenerativa.	1.32	66.1	1012325	883274
		Total Cuidado paliativo					4.67727e+06
		Rehabilitacion	caminadores	1	20.92	25000	5230
			consulta de control o de seguimiento por enfermeria	2	54.6	20000	21840
			consulta de primera vez por medicina general (414)	2	13.62	28557	7778.93
			consulta de primera vez por psicologia	3.91	100	26499	103611
			consulta primera vez medicina especializada (305)	25.23	100	24896	628126
			dexametasona	10	80	7271.34	58170.7
			electromiografía en cada extremidad (uno o mas musculos)	1	28.16	119702	33708.1
			infiltracion intralesional con medicamento hasta de cinco lesiones	2	36.32	52543	38167.2
			muletas	1	4.54	20000	908
			neuroconduccion por cada extremidad (uno o mas nervios)	1	28.16	91680	25817.1
			ortesis de miembro inferior	1	4.54	240640	10925.1
			ortesis de tronco	1	20.92	240640	50341.9
			potenciales evocados somatosensoriales (275)	1	9.08	201012	18251.9
			radiografia de miembro inferior ap y lateral	1.55	50	32735	25369.6
			resonancia nuclear magnetica de miembro inferior sin incluir articulaciones	1	33.62	212888	71572.9
			sillas de ruedas	1	15.46	35000	5411
			tomografia axial computada de miembros inferiores y articulaciones	2	27.3	99102	54109.7
			ultrasonografía articular de hombro	1	4.54	32400	1470.96
		Total Rehabilitacion					1.16081e+06
		Seguimiento 1 año	consulta primera vez medicina especializada (305)	11.1834	100	24896	278423
			creatinina en suero, orina u otros	2.65	63.21	3840	6432.25
			gamagrafia osea (corporal total o segmentaria)	2.28	36.14	150856	124304
			hemograma iv [hemoglobina, hematocrito, recuento de eritrocitos,indices eritrocitarios,leucograma,recuento de plaquetas,indices plaquetarios y morfologia electronica e histograma] metodo automatico (233)	2.77	71.42	13218	26149.6
			nitrogeno ureico [bun] *	2.65	58.15	4581	7059.21
			radiografia de columna cervical	2.3	1.79	31510	1297.27
			radiografia de columna dorsolumbar	3.54	2.28	31300	2526.29
			radiografia de columna lumbosacra	3.54	2.28	39696	3203.94
			radiografia de torax (p.a.ó a.p.y lateral, decubito lateral, oblicuas ó lateral con bario)	2.28	42.54	34462	33425.1
			resonancia nuclear magnetica de mama	1.08	4.42	295021	14083.1
			tomografia axial computada de abdomen y pelvis (abdomen total)	2.09	25.94	174298	94495
			tomografia axial computada de craneo simple	1.23	4.11	117075	5918.49
			tomografia axial computada de torax	2.09	25.53	129990	69359.7
			transaminasa glutámico oxalacética o aspartato amino transferasa [tgo-ast]	2.77	67.65	11900	22299.5
			transaminasa glutámico pirúvica o alanino amino transferasa [tgp-alt]	2.77	67.65	12023	22530
			ultrasonografia de higado, pancreas, via biliar y vesicula	2.12	18.98	30237	12166.6
			ultrasonografía de abdomen total : higado, pancreas, vesicula, vias biliares, riñones, bazo, grandes vasos, pelvis y flancos	1.74	32.44	59246	33441.8
			ultrasonografia diagnostica de mama, con transductor de 7 mhz o mas	1.91	36.42	37698	26223.6
			xeromamografia o mamografia unilateral o de pieza quirurgica	2.13	71.37	54590	82986.7
		Total Seguimiento 1 año					866325
		Seguimiento 3 a 5 años	consulta primera vez medicina especializada (305)	8.96784	100	24896	223263
			creatinina en suero, orina u otros	3.49	40.83	3840	5471.87
			gamagrafia osea (corporal total o segmentaria)	2.02	29.56	150856	90077.9
			hemograma iv [hemoglobina, hematocrito, recuento de eritrocitos,indices eritrocitarios,leucograma,recuento de plaquetas,indices plaquetarios y morfologia electronica e histograma] metodo automatico (233)	3.52	52.78	13218	24557.1
			nitrogeno ureico [bun] *	3.63	23.56	4581	3917.8
			radiografia de columna cervical	1	3.1	31510	976.81
			radiografia de columna dorsolumbar	1	3.1	31300	970.3
			radiografia de columna lumbosacra	1	3.1	39696	1230.58
			radiografia de torax (p.a.ó a.p.y lateral, decubito lateral, oblicuas ó lateral con bario)	3	38.625	68924	82126.4
			resonancia nuclear magnetica de mama	1.25	0.96	295021	3540.25
			tomografia axial computada de abdomen y pelvis (abdomen total)	1.86	7.23	174298	23439.2
			tomografia axial computada de craneo simple	1.47	4.33	117075	7451.94
			tomografia axial computada de torax	1.86	6.62	129990	16005.9
			transaminasa glutámico pirúvica o alanino amino transferasa [tgp-alt]	3.52	47.12	12023	19941.6
			ultrasonografia de higado, pancreas, via biliar y vesicula	2.63	18.74	30237	14902.7
			ultrasonografía de abdomen total : higado, pancreas, vesicula, vias biliares, riñones, bazo, grandes vasos, pelvis y flancos	1.61	31.63	59246	30170.6
			ultrasonografia diagnostica de mama, con transductor de 7 mhz o mas	1.98	36.7	37698	27393.6
			xeromamografia o mamografia unilateral o de pieza quirurgica	2.09	70.53	54590	80469.9
		Total Seguimiento 3 a 5 años					655908
	Total ESTADIO IV						1.44401e+08
	RECAIDA LOCAL	Estudio de extensión	consulta primera vez medicina especializada (305)	5.23397	100	24896	130305
			gamagrafia osea (corporal total o segmentaria)	1.46	100	150856	220250
			radiografia de torax (p.a.ó a.p.y lateral, decubito lateral, oblicuas ó lateral con bario)	1.55	82.89	34462	44276.6
			resonancia nuclear magnetica de mama	1	4.51	295021	13305.4
			tomografia axial computada de abdomen y pelvis (abdomen total)	1.04	38.55	174298	69879.6
			tomografia axial computada de columna segmentos cervical, toracico, lumbar y/o sacro, complemento a mielografia (cada segmento)	1.39	10.7467	297150	44387.9
			tomografia axial computada de craneo simple	1.2	18.5	117075	25990.7
			tomografia axial computada de torax	1.09	41.59	129990	58928.5
			ultrasonografia de higado, pancreas, via biliar y vesicula	1.14	42.34	30237	14594.7
			ultrasonografía de abdomen total : higado, pancreas, vesicula, vias biliares, riñones, bazo, grandes vasos, pelvis y flancos	1.25	47.99	59246	35540.2
		Total Estudio de extensión					657458
		Recaida cirugia conservadora	consulta primera vez medicina especializada (305)	4.36984	100	24896	108792
			creatinina en suero, orina u otros	1.2	89.07	3840	4104.35
			electrocardiograma de ritmo o de superficie sod	1	44.66	13635	6089.39
			glucosa en suero, lcr u otro fluido diferente a orina	1.2	87.12	6696	7000.27
			habitacion bipersonal	1.09	48.53	501398	265228
			hemograma iv [hemoglobina, hematocrito, recuento de eritrocitos,indices eritrocitarios,leucograma,recuento de plaquetas,indices plaquetarios y morfologia electronica e histograma] metodo automatico (233)	1.2	94.54	13218	14995.6
			insercion (subcutanea) (tejido blando) de expansor de tejidos [unico o multiple] ncoc	1.02	3.44	708038	24843.6
			mamoplastia de reduccion sod	1.04	6.69	2453256	170688
			mastectomia simple unilateral sod	1	0	432187	0
			mastectomia radical bilateral sod	1.03	0	660864	0
			mastectomia radical modificada unilateral	1.01	100	589883	595782
			mastectomia simple ampliada bilateral sod	1.01	0	671186	0
			reconstruccion de mama con colgajo sod	1.02	90.46	1026680	947309
			reconstrucción de mama con prótesis sod	1.01	9.57	840690	81258.6
			reconstrucción del complejo areola, pezón (225)	1.03	0.55	523900	2967.89
			reseccion de cuadrante de mama sod	1	2.07	416016	8611.53
			reseccion local de lesión de mama sod (218)	1	6.32	270910	17121.5
			tiempo de protrombina [pt]	1.2	87.52	9299	9766.18
			tiempo de tromboplastina parcial [ptt]	1.2	87.52	11600	12182.8
			unidad de cuidados intensivos adulto	2	0.98	3264255	63979.4
			unidad de cuidados intermedios adulto	1.5	0.98	238810	3510.51
		Total recaída cirugia conservadora					2.34423e+06
		Recaída mastectomía	consulta primera vez medicina especializada (305)	4.19332	100	24896	104397
			hemograma iv [hemoglobina, hematocrito, recuento de eritrocitos, índices eritrocitarios, leucograma, recuento de plaquetas, índices plaquetarios y morfología electrónica e histograma] método automático (233)	1	95.37	13218	12606
			tiempo de protrombina [pt]	1	79.95	9299	7434.55
			tiempo de tromboplastina parcial [ptt]	1	77.14	11600	8948.24
			creatinina en suero, orina u otros	1	81.87	3840	3143.81
			glucosa en suero, lcr u otro fluido diferente a orina	1	87	6696	5825.52
			electrocardiograma de ritmo o de superficie sod	1	49.56	13635	6757.51
			reseccion local de lesión de mama sod (218)	1.01	49.1	270910	134347
			reconstrucción de mama con colgajo sod	1.01	31.62	1026680	327883
			reconstrucción del complejo areola, pezón (225)	1.01	9.06	523900	47940
			biopsia de ganglio centinela	1.01	2.06	668000	13898.4
			vaciamiento radical linfático axilar sod	1.01	9.5	744083	71394.8
			habitación bipersonal	1.12	32.09	501398	180206
			unidad de cuidados intermedios adulto	1.5	0.98	238810	3510.51
			unidad de cuidados intensivos adulto	2	0.98	3264255	63979.4
		Total recaída mastectomía					992272
		Quimioterapia adyuvante	aprepitant	9.48	36.62	235193	815346
			ciclofosfamida/metotrexate/fluoracilo	5.23	9.47	617382	298622
			codeína	20	55	8733.33	95106
			consulta primera vez medicina especializada (305)	8.98	96.51	24896	215764
			creatinina en suero, orina u otros	6.14	84.64	3840	19956.1
			dexametasona	9.55	97.52	2787.34	25746.1
			docetaxel	4.67	40.56	875758	1.55382e+06
			doxorubicina	7.045	19.76	1.16028e+07	9.7076e+06
			doxorubicina/ciclosfosfamida	4.2	72.93	940241	2.70894e+06
			doxorubicina/docetacel	5.64	72.7	1.508e+06	5.93031e+06
			doxorubicina/placlitaxel	6.18	87.59	1.1211e+06	5.73724e+06
			ecocardiograma modo m	1.66	33.76	149331	83687.5
			epirubicina	6	5		0
			epirubicina/ciclosfosfamida	4.8	5.4	1.00518e+06	245431
			fluoracilo/doxorubicina/ciclosfosfamida	4.82	17.22	966867	746328
			fluoracilo/epirubicina/ciclosfosfamida	4.5	14	1.02241e+06	598258
			gamagrafia osea (corporal total o segmentaria)	1.87	78.71	150856	222041
			hemograma iv [hemoglobina, hematocrito, recuento de eritrocitos,indices eritrocitarios,leucograma,recuento de plaquetas,indices plaquetarios y morfologia electronica e histograma] metodo automatico (233)	8.8	95.96	13218	111619
			metoclopramida	11.88	53	11591.9	71892.6
			morfina	182.12	35.01	1377	74882.8
			nitrogeno ureico [bun] *	5.15	25.43	4581	5999.48
			ondansetrón	9.91	95.39	4386.2	41160.7
			paclitaxel	4.25	70.67	210600	472627
			paracetamol	895.3	64.94	180.641	99827.3
			placlitaxel/carboplatino	6	20	921761	0
			radiografia de torax (p.a.ó a.p.y lateral, decubito lateral, oblicuas ó lateral con bario)	2.07	56.71	34462	40454.8
			resonancia nuclear magnetica de base de craneo-silla turca	1.99	13.22	603676	158814
			resonancia nuclear magnetica de columna cervical simple	1.39	5.19	394954	28492.4
			resonancia nuclear magnetica de columna lumbosacra simple	1.17	4.03	416691	19647.4
			resonancia nuclear magnetica de columna toracica simple	1.17	1.02	396157	4727.74
			tomografia axial computada de columna segmentos cervical, toracico, lumbar y/o sacro, complemento a mielografia (cada segmento)	1.735	4.7625	396200	55562
			tomografia axial computada de craneo simple	1.15	1.48	117075	1992.62
			tomografia axial computada de pelvis	1.04	19.26	117461	23527.9
			tomografia axial computada de torax	1.04	18.94	129990	25604.9
			tramadol	272.4	36.17	1412.5	111377
			transaminasa glutámico oxalacética o aspartato amino transferasa [tgo-ast]	7.17	61.31	11900	52311.5
			transaminasa glutámico pirúvica o alanino amino transferasa [tgp-alt]	7.36	75.84	12023	67110.3
			transtuzumab temprano	18	20.42	5.55796e+06	2.01122e+07
			ultrasonografia de higado, pancreas, via biliar y vesicula	1.97	31.64	30237	18847
			ultrasonografía de abdomen total : higado, pancreas, vesicula, vias biliares, riñones, bazo, grandes vasos, pelvis y flancos	1.35	44.35	59246	35472.1
			ultrasonografia diagnostica de mama, con transductor de 7 mhz o mas	1.4	38.19	37698	20155.6
			ultrasonografía pelvica ginecologica transabdominal	1.98	4.63	21518	1972.64
			ventriculografia nuclear	1.92	19.47	110820	41427.2
			xeromamografia o mamografia, bilateral	1.98	52.59	71195	74134.1
		Total Quimioterapia adyuvante					5.0776e+07
		Radioterapia	braquiterapia intracavitaria con baja tasa de dosis (170)	1	1.09	888595	9685.69
			radioterapia conformal o conformacional	1	39.59	5665000	2.24277e+06
			teleterapia con acelerador lineal hasta 10 mv,pre o pop ganglionar de mama, campos multiples en: cara, encefalo, mama, torax, parcial de abdomen, pelvis o raquis, cuello, mediastino, ( grupo 4 ) con simulador y con planeacion computarizada ( tipo i)	1	42.27	4577042	1.93472e+06
			teleterapia utilizando cobalto pre o posoperatorio ganglionar de mama, campos multiples en: cara, encefalo, mama, torax, parcial de abdomen, pelvis o raquis, cuello, mediastino, ( grupo 4 ) con simulador y con planeacion computarizada ( tipo i)	1	18.485	3780000	698733
		Total Radioterapia					4.88591e+06
		Hormonoterapia premenopáusicas	consulta primera vez medicina especializada (305)	7.82	94.29	24896	183570
			goserelina	4.5	32.64	1.46461e+06	2.06517e+06
			ooforectomía bilateral por laparotomía	1	11.66	468000	54568.8
			tamoxifeno	363.36	66.87	47.0639	10939.2
		Total Hormonoterapia premenopáusicas					2.31425e+06
		Hormonoterapia postmenopaúsicas	anastrozol	340.36	38.4	576	50363.8
			consulta primera vez medicina especializada (305)	12	94.13	24896	281215
			exemestano	340.44	31.94	15687.5	1.1011e+06
			fulvestrant	12	17.13	1.85679e+06	2.77559e+06
			letrozol	365	20.47	8852.1	661389
			tamoxifeno	365	25	47.0639	4294.58
		Total Hormonoterapia postmenopaúsicas					4.87395e+06
		Recaida Mastectomia	biopsia de glanglio centinela	1.01	2.06	668000	13898.4
			consulta primera vez medicina especializada (305)	1.935	48.2025	99584	104397
			creatinina en suero, orina u otros	1	81.87	3840	3143.81
			electrocardiograma de ritmo o de superficie sod	1	49.56	13635	6757.51
			glucosa en suero, lcr u otro fluido diferente a orina	1	87	6696	5825.52
			habitacion bipersonal	1.12	32.09	501398	180206
			hemograma iv [hemoglobina, hematocrito, recuento de eritrocitos,indices eritrocitarios,leucograma,recuento de plaquetas,indices plaquetarios y morfologia electronica e histograma] metodo automatico (233)	1	95.37	13218	12606
			reconstruccion de mama con colgajo sod	1.01	31.62	1026680	327883
			reconstrucción del complejo areola, pezón (225)	1.01	9.06	523900	47940
			reseccion local de lesión de mama sod (218)	1.01	49.1	270910	134347
			tiempo de protrombina [pt]	1	79.95	9299	7434.55
			tiempo de tromboplastina parcial [ptt]	1	77.14	11600	8948.24
			unidad de cuidados intensivos adulto	2	0.98	3264255	63979.4
			unidad de cuidados intermedios adulto	1.5	0.98	238810	3510.51
			vaciamiento radical linfatico axilar sod	1.01	9.5	744083	71394.8
		Total Recaida Mastectomia				7395908	992272
		Rehabilitacion	caminadores	1	10	25000	2500
			consulta de primera vez por medicina general (414)	2	30	28557	17134.2
			consulta de primera vez por psicologia	5	100	26499	132495
			consulta primera vez medicina especializada (305)	7.8	100	24896	194189
			dexametasona	3	80	7271.34	17451.2
			electromiografía en cada extremidad (uno o mas musculos)	1	50	119702	59851
			infiltracion intralesional con medicamento hasta de cinco lesiones	2	80	52543	84068.8
			lidocaína	3	80	10800	25920
			muletas	1	10	20000	2000
			neuroconduccion por cada extremidad (uno o mas nervios)	1	50	91680	45840
			ortesis de miembro inferior	1	10	240640	24064
			ortesis de tronco	1	10	240640	24064
			potenciales evocados somatosensoriales (275)	1	20	201012	40202.4
			radiografia de miembro inferior ap y lateral	1	60	32735	19641
			resonancia nuclear magnetica de miembro inferior sin incluir articulaciones	1	50	212888	106444
			sillas de ruedas	1	10	35000	3500
			terapia fisica integral sod (198) (295)	20	100	7785	155700
			terapia ocupacional integral sod (198) (296)	5	100	5950	29750
			ultrasonografía articular de hombro	1	10	32400	3240
		Total Rehabilitacion					988054
		Seguimiento 1 año	consulta primera vez medicina especializada (305)	12.3254	100	24896	306854
			creatinina en suero, orina u otros	2.44	23.09	3840	2163.44
			gamagrafia osea (corporal total o segmentaria)	1	4.84	150856	7301.43
			hemograma iv [hemoglobina, hematocrito, recuento de eritrocitos,indices eritrocitarios,leucograma,recuento de plaquetas,indices plaquetarios y morfologia electronica e histograma] metodo automatico (233)	2.9	26.83	13218	10284.5
			nitrogeno ureico [bun] *	2.57	22.15	4581	2607.76
			radiografia de torax (p.a.ó a.p.y lateral, decubito lateral, oblicuas ó lateral con bario)	1	8.58	34462	2956.84
			resonancia nuclear magnetica de mama	1.08	2.02	295021	6436.18
			tomografia axial computada de abdomen y pelvis (abdomen total)	1	7.93	174298	13821.8
			tomografia axial computada de craneo simple	1	0.47	117075	550.252
			tomografia axial computada de torax	1	1.4	129990	1819.86
			transaminasa glutámico oxalacética o aspartato amino transferasa [tgo-ast]	2.55	27.3	11900	8284.19
			transaminasa glutámico pirúvica o alanino amino transferasa [tgp-alt]	2.55	27.3	12023	8369.81
			ultrasonografia de higado, pancreas, via biliar y vesicula	1	1.95	30237	589.621
			ultrasonografía de abdomen total : higado, pancreas, vesicula, vias biliares, riñones, bazo, grandes vasos, pelvis y flancos	1	4.68	59246	2772.71
			ultrasonografia diagnostica de mama, con transductor de 7 mhz o mas	1.92	32.35	37698	23415
			xeromamografia o mamografia unilateral o de pieza quirurgica	1.84	92.97	54590	93384.3
		Total Seguimiento 1 año					491611
		Seguimiento 3 a 5 años	consulta primera vez medicina especializada (305)	7.8505	100	24896	195446
			creatinina en suero, orina u otros	1.8	12.76	3840	881.971
			gamagrafia osea (corporal total o segmentaria)	1	2.89	150856	4359.74
			hemograma iv [hemoglobina, hematocrito, recuento de eritrocitos,indices eritrocitarios,leucograma,recuento de plaquetas,indices plaquetarios y morfologia electronica e histograma] metodo automatico (233)	1.85	17.44	13218	4264.66
			nitrogeno ureico [bun] *	1.8	12.76	4581	1052.16
			radiografia de columna dorsolumbar	1	8.1	31300	2535.3
			radiografia de columna lumbosacra	1	40.48	39696	16068.9
			radiografia de torax (p.a.ó a.p.y lateral, decubito lateral, oblicuas ó lateral con bario)	1	6.63	34462	2284.83
			resonancia nuclear magnetica de mama	1.15	5.8	295021	19677.9
			tomografia axial computada de abdomen y pelvis (abdomen total)	2	3.13	174298	10911.1
			transaminasa glutámico oxalacética o aspartato amino transferasa [tgo-ast]	1.73	20.25	11900	4168.87
			transaminasa glutámico pirúvica o alanino amino transferasa [tgp-alt]	1.73	20.25	12023	4211.96
			ultrasonografia de higado, pancreas, via biliar y vesicula	1	1.44	30237	435.413
			ultrasonografía de abdomen total : higado, pancreas, vesicula, vias biliares, riñones, bazo, grandes vasos, pelvis y flancos	1	1.4	59246	829.444
			ultrasonografia diagnostica de mama, con transductor de 7 mhz o mas	2	25.79	37698	19444.6
			xeromamografia o mamografia unilateral o de pieza quirurgica	1.77	70.64	54590	68255.4
		Total Seguimiento 3 a 5 años					354828
	Total RECAIDA LOCAL						6.86786e+07
	RECAIDA SISTEMICA	Estudio de extensión	consulta primera vez medicina especializada (305)	5.23397	100	24896	130305
			gamagrafia osea (corporal total o segmentaria)	1.46	100	150856	220250
			radiografia de torax (p.a.ó a.p.y lateral, decubito lateral, oblicuas ó lateral con bario)	1.55	82.89	34462	44276.6
			resonancia nuclear magnetica de mama	1	4.51	295021	13305.4
			tomografia axial computada de abdomen y pelvis (abdomen total)	1.04	38.55	174298	69879.6
			tomografia axial computada de columna segmentos cervical, toracico, lumbar y/o sacro, complemento a mielografia (cada segmento)	1.39	10.7467	297150	44387.9
			tomografia axial computada de craneo simple	1.2	18.5	117075	25990.7
			tomografia axial computada de torax	1.09	41.59	129990	58928.5
			ultrasonografia de higado, pancreas, via biliar y vesicula	1.14	42.34	30237	14594.7
			ultrasonografía de abdomen total : higado, pancreas, vesicula, vias biliares, riñones, bazo, grandes vasos, pelvis y flancos	1.25	47.99	59246	35540.2
		Total Estudio de extensión					657458
		Quimioterapia adyuvante	aprepitant	15.74	36.01	235193	1.33307e+06
			bevacizumab	13.33	12		0
			capecitabina	6.85	23.04	1062605	1.93397e+06
			capecitabina/ixabepilona	6.31	12.82	7.84692e+06	5.38825e+06
			ciclofosfamida/metotrexate/fluoracilo	6.31	12.98	617382	432591
			codeína	174.8	33.57	8733.33	484801
			consulta primera vez medicina especializada (305)	11.44	96.98	24896	276209
			creatinina en suero, orina u otros	7.41	81.14	3840	23087.9
			dexametasona	11.61	96.25	2787.34	30854.7
			docetaxel	6.27	44.53	875758	2.09793e+06
			docetaxel/capecitabina	8.32	19.08	1.66257e+06	4.77109e+06
			doxorubicina	5.5	10	1.16028e+07	4.73538e+06
			doxorubicina/ciclosfosfamida	4.95	41.82	940241	1.65501e+06
			doxorubicina/docetacel	5	10	1.508e+06	716298
			doxorubicina/placlitaxel	6	10	1.1211e+06	605394
			ecocardiograma modo m	1.71	30.85	149331	78777.3
			epirubicina	6	10		0
			epirubicina/ciclosfosfamida	4.33	7.83	1.00518e+06	301025
			fluoracilo/doxorubicina/ciclosfosfamida	4.22	11.39	966867	384473
			fluoracilo/epirubicina/ciclosfosfamida	5.14	11	1.02241e+06	429450
			gamagrafia osea (corporal total o segmentaria)	3.01	89.6	150856	406853
			gemcitabina	6.57	23.41	1.50663e+06	2.82806e+06
			haloperidol	1	5	973.73	37.0629
			hemograma iv [hemoglobina, hematocrito, recuento de eritrocitos,indices eritrocitarios,leucograma,recuento de plaquetas,indices plaquetarios y morfologia electronica e histograma] metodo automatico (233)	12	85.82	13218	136124
			ixabepilona	5.67	42.95	5.06517e+06	1.32069e+07
			lapatinib	157	17.4		0
			lapatinib/capecitabine	18	36.88	7.57423e+06	4.36889e+07
			metoclopramida	205.85	46.2	11591.9	1.08743e+06
			morfina	421.23	41.43	1377	210294
			nitrogeno ureico [bun] *	10.06	31.25	4581	14401.5
			ondansetrón	12.49	72.65	4386.2	38984.4
			osteodensitometria por tac	1.26	35.21	118064	52378.6
			paclitaxel	6.38	43.44	210600	503942
			paracetamol	798.97	66.04	180.641	94045.8
			placlitaxel/carboplatino	6.41	16.94	921761	792511
			radiografia de torax (p.a.ó a.p.y lateral, decubito lateral, oblicuas ó lateral con bario)	1.45	64.02	34462	31990.7
			resonancia nuclear magnetica de base de craneo-silla turca	1.35	16.7	603676	136099
			resonancia nuclear magnetica de columna cervical simple	1.23	11.69	394954	56789.3
			resonancia nuclear magnetica de columna lumbosacra simple	1.23	11.84	416691	60683.5
			resonancia nuclear magnetica de columna toracica simple	1.23	12	396157	58472.8
			tomografia axial computada de abdomen y pelvis (abdomen total)	1.88	35.73	174298	117080
			tomografia axial computada de columna segmentos cervical, toracico, lumbar y/o sacro, complemento a mielografia (cada segmento)	1.54	5.44	297150	24894
			tomografia axial computada de craneo simple	1.17	8.55	117075	11711.6
			tomografia axial computada de torax	2.07	37	129990	99559.3
			tramadol	284.02	26.28	1412.5	83204.9
			transaminasa glutámico oxalacética o aspartato amino transferasa [tgo-ast]	11.33	75.2	11900	101390
			transaminasa glutámico pirúvica o alanino amino transferasa [tgp-alt]	11.26	72.03	12023	97513.5
			transtuzumab avanzado	12	23.52	6.13215e+06	2.83856e+07
			trastuzumab/lapatinib	4.64	4.82	7.68177e+06	1.48241e+06
			ultrasonografia de higado, pancreas, via biliar y vesicula	1.64	29.44	30237	14598.9
			ultrasonografía de abdomen total : higado, pancreas, vesicula, vias biliares, riñones, bazo, grandes vasos, pelvis y flancos	1.74	64.94	59246	66945.4
			ultrasonografia diagnostica de mama, con transductor de 7 mhz o mas	1.36	32.01	37698	16411.3
			ultrasonografía pelvica ginecologica transabdominal	1.59	22.65	21518	7749.38
			ventriculografia nuclear	1.36	14.87	110820	22411.4
			vinorelbina	6.86	20.14	710244	1.1505e+06
			xeromamografia o mamografia, bilateral	2.13	60.56	71195	91836.4
		Total Quimioterapia adyuvante					1.20856e+08
		Radioterapia	teleterapia con acelerador lineal hasta 10 mv,pre o pop ganglionar de mama, campos multiples en: cara, encefalo, mama, torax, parcial de abdomen, pelvis o raquis, cuello, mediastino, ( grupo 4 ) con simulador y con planeacion computarizada ( tipo i)	1	50	4577042	2288521
			teleterapia utilizando cobalto pre o posoperatorio ganglionar de mama, campos multiples en: cara, encefalo, mama, torax, parcial de abdomen, pelvis o raquis, cuello, mediastino, ( grupo 4 ) con simulador y con planeacion computarizada ( tipo i)	1	31.885	3780000	1205253
		Total Radioterapia					3493774
		Hormonoterapia premenopáusicas	consulta primera vez medicina especializada (305)	10.46	38.26	24896	99633.7
			goserelina	4.5	23.32	1.46461e+06	1.38327e+06
			ooforectomía bilateral por laparotomía	1	3.52	468000	16473.6
			tamoxifeno	363.13	65.31	47.0639	6333.13
		Total Hormonoterapia premenopáusicas					1.50571e+06
		Hormonoterapia postmenopaúsicas	anastrozol	268.65	23.55	576	22040
			consulta primera vez medicina especializada (305)	4.58	71.1	24896	81070.8
			exemestano	281.47	26.2	15687.5	852387
			fulvestrant	12	14.11	1.85679e+06	2.72955e+06
			letrozol	268.65	24.09	8852.1	346483
			tamoxifeno	281.47	22.43	47.0639	2178.87
		Total Hormonoterapia postmenopaúsicas					4.03371e+06
		Recaida sistemica	aprepitant	3	5	235193	35278.9
			bevacizumab	6	0	455930639	0
			capecitabina	6	50	1062605	2.86903e+06
			capecitabina/ixabepilona	6	10	7.84692e+06	4.00193e+06
			ciclofosfamida/metotrexate/fluoracilo	6	5	617382	166693
			consulta primera vez medicina especializada (305)	7	50	49792	174272
			creatinina en suero, orina u otros	12	50	3840	23040
			dexametasona	1	70	2787.34	1756.02
			docetaxel	6	20	875758	945819
			docetaxel/capecitabina	6	10	1.66257e+06	897788
			doxorubicina	6	5	673209	181766
			doxorubicina/ciclosfosfamida	6	15	940241	761596
			epirubicina/ciclosfosfamida	6	15	1.00518e+06	814197
			fluoracilo/doxorubicina/ciclosfosfamida	6	5	966867	261054
			fluoracilo/epirubicina/ciclosfosfamida	6	5	1.02241e+06	276051
			gemcitabina	6	10	1.50663e+06	813581
			hemograma iv [hemoglobina, hematocrito, recuento de eritrocitos,indices eritrocitarios,leucograma,recuento de plaquetas,indices plaquetarios y morfologia electronica e histograma] metodo automatico (233)	12	50	13218	79308
			ixabepilona	6	15	5.06517e+06	4.10279e+06
			lapatinib/capecitabine	6	5	7.57423e+06	2.04504e+06
			metoclopramida	5	50	11591.9	26081.8
			nitrogeno ureico [bun] *	12	50	4581	27486
			ondansetrón	5	50	4386.2	9868.95
			paclitaxel	6	25	210600	284310
			paracetamol	90	10	180.641	1463.19
			placlitaxel/carboplatino	6	10	921761	553057
			tramadol	30	5	1412.5	1906.87
			transaminasa glutámico oxalacética o aspartato amino transferasa [tgo-ast]	12	50	11900	71400
			transaminasa glutámico pirúvica o alanino amino transferasa [tgp-alt]	12	50	12023	72138
			transtuzumab avanzado	12	15	6.13215e+06	9.93408e+06
			trastuzumab/lapatinib	6	1	7.68177e+06	414816
			vinorelbina	6	10	710244	383532
		Total Recaida sistemica				5.02757e+08	3.02311e+07
		Cuidado paliativo	analgesia post operatoria, por paciente	1	17.47	250775	43810.4
			atención mensual domiciliaria paciente crónico y/o terminal, con tratamiento definido.	10.055	36.345	207720	758431
			bloqueo de plejo braquial (65)	1	4.85	75355	3654.72
			bloqueo del simpatico presacro ( ganglio impar de walter) (65)	1	0.59	241314	1423.75
			bloqueo paracervical bilateral (65)	1	1.78	88095	1568.09
			buprenorfina	61.27	8.82	12077.6	91826.9
			consulta de control o de seguimiento por enfermeria	14.31	40.95	20000	117199
			consulta de primera vez por medicina general (414)	4.13	43.41	28557	51197.9
			consulta de primera vez por psicologia	6.23	56.69	26499	93588.8
			consulta de primera vez por trabajo social (306)	4.13	17.36	17000	12188.5
			consulta primera vez medicina especializada (305)	14.2068	100	24896	353692
			fentanilo	93.71	15.04	6848.23	202447
			habitacion bipersonal	5.85	22.63	501398	663778
			hidromorfona	75.72	11.59	3832	33629.4
			insercion de bomba de infusion totalmente implantable	1.34	1.96	102943	2703.69
			insercion de cateter subaracnoideo en canal espinal con puerta de entrada implantable para infusion de sustancia terapeutica o paliativa	1	1.18	571574	6744.57
			insercion de cateter subdermico (epidermoclisis)	10.35	26.49	30935	84815
			inyeccion de anestesia en nervio de faceta articular vertebral con fines analgesicos sod	1	1.45	155052	2248.25
			lidocaína	46.98	21.46	10800	108885
			metadona	80.28	11.04	6444	57112.6
			monoquimioterapia (ciclo de tratamiento) (278)	5	7.27	221962	80683.2
			morfina	232.83	45.12	2637	289316
			morfina, combinaciones	172.22	53.4	2637	253273
			neurolisis de plejo toracico (30)	1	0.15	1005924	1508.89
			oxicodona	148.94	36.69	106.315	206762
			paracetamol	178.52	44.29	180.641	46450
			radiografia de abdomen simple	1	0.64	29475	188.64
			radiografia de craneo simple	1	3.84	33109	1271.39
			radiografia de torax (p.a.ó a.p.y lateral, decubito lateral, oblicuas ó lateral con bario)	1	13.49	34462	4648.92
			radiografias comparativas de extremidades inferiores (54)	1	1.08	18460	199.368
			resonancia nuclear magnetica de cerebro	1	5.97	380000	22686
			resonancia nuclear magnetica de mama	1	2.1	295021	6195.44
			resonancia nuclear magnetica de torax proyecciones pa y lateral	1	2.1	399420	8387.82
			tomografia axial computada de abdomen y pelvis (abdomen total)	1.61	25.42	174298	71333.5
			tomografia axial computada de craneo simple	1	10.53	117075	12328
			tomografia axial computada de miembros inferiores y articulaciones	1	1.08	99102	1070.3
			tomografia axial computada de torax	1	16.2	129990	21058.4
			tramadol	109.17	22.4	1412.5	75694.4
			tratamiento mensual integral de pacientes con enfermedad cerebro-vascular, trauma cráneo-encefálico, trauma raquimedular o enfermedad degenerativa.	1.32	66.1	1012325	883274
		Total Cuidado paliativo					4.67727e+06
		Rehabilitacion	caminadores	1	20.92	25000	5230
			consulta de control o de seguimiento por enfermeria	2	54.6	20000	21840
			consulta de primera vez por medicina general (414)	2	13.62	28557	7778.93
			consulta de primera vez por psicologia	3.91	100	26499	103611
			consulta primera vez medicina especializada (305)	25.23	100	24896	628126
			dexametasona	10	80	7271.34	58170.7
			electromiografía en cada extremidad (uno o mas musculos)	1	28.16	119702	33708.1
			infiltracion intralesional con medicamento hasta de cinco lesiones	2	36.32	52543	38167.2
			muletas	1	4.54	20000	908
			neuroconduccion por cada extremidad (uno o mas nervios)	1	28.16	91680	25817.1
			ortesis de miembro inferior	1	4.54	240640	10925.1
			ortesis de tronco	1	20.92	240640	50341.9
			potenciales evocados somatosensoriales (275)	1	9.08	201012	18251.9
			radiografia de miembro inferior ap y lateral	1.55	50	32735	25369.6
			resonancia nuclear magnetica de miembro inferior sin incluir articulaciones	1	33.62	212888	71572.9
			sillas de ruedas	1	15.46	35000	5411
			tomografia axial computada de miembros inferiores y articulaciones	2	27.3	99102	54109.7
			ultrasonografía articular de hombro	1	4.54	32400	1470.96
		Total Rehabilitacion					1.16081e+06
		Seguimiento 1 año	consulta primera vez medicina especializada (305)	11.1834	100	24896	278423
			creatinina en suero, orina u otros	2.65	63.21	3840	6432.25
			gamagrafia osea (corporal total o segmentaria)	2.28	36.14	150856	124304
			hemograma iv [hemoglobina, hematocrito, recuento de eritrocitos,indices eritrocitarios,leucograma,recuento de plaquetas,indices plaquetarios y morfologia electronica e histograma] metodo automatico (233)	2.77	71.42	13218	26149.6
			nitrogeno ureico [bun] *	2.65	58.15	4581	7059.21
			radiografia de columna cervical	2.3	1.79	31510	1297.27
			radiografia de columna dorsolumbar	3.54	2.28	31300	2526.29
			radiografia de columna lumbosacra	3.54	2.28	39696	3203.94
			radiografia de torax (p.a.ó a.p.y lateral, decubito lateral, oblicuas ó lateral con bario)	2.28	42.54	34462	33425.1
			resonancia nuclear magnetica de mama	1.08	4.42	295021	14083.1
			tomografia axial computada de abdomen y pelvis (abdomen total)	2.09	25.94	174298	94495
			tomografia axial computada de craneo simple	1.23	4.11	117075	5918.49
			tomografia axial computada de torax	2.09	25.53	129990	69359.7
			transaminasa glutámico oxalacética o aspartato amino transferasa [tgo-ast]	2.77	67.65	11900	22299.5
			transaminasa glutámico pirúvica o alanino amino transferasa [tgp-alt]	2.77	67.65	12023	22530
			ultrasonografia de higado, pancreas, via biliar y vesicula	2.12	18.98	30237	12166.6
			ultrasonografía de abdomen total : higado, pancreas, vesicula, vias biliares, riñones, bazo, grandes vasos, pelvis y flancos	1.74	32.44	59246	33441.8
			ultrasonografia diagnostica de mama, con transductor de 7 mhz o mas	1.91	36.42	37698	26223.6
			xeromamografia o mamografia unilateral o de pieza quirurgica	2.13	71.37	54590	82986.7
		Total Seguimiento 1 año					866325
		Seguimiento 3 a 5 años	consulta primera vez medicina especializada (305)	8.96784	100	24896	223263
			creatinina en suero, orina u otros	3.49	40.83	3840	5471.87
			gamagrafia osea (corporal total o segmentaria)	2.02	29.56	150856	90077.9
			hemograma iv [hemoglobina, hematocrito, recuento de eritrocitos,indices eritrocitarios,leucograma,recuento de plaquetas,indices plaquetarios y morfologia electronica e histograma] metodo automatico (233)	3.52	52.78	13218	24557.1
			nitrogeno ureico [bun] *	3.63	23.56	4581	3917.8
			radiografia de columna cervical	1	3.1	31510	976.81
			radiografia de columna dorsolumbar	1	3.1	31300	970.3
			radiografia de columna lumbosacra	1	3.1	39696	1230.58
			radiografia de torax (p.a.ó a.p.y lateral, decubito lateral, oblicuas ó lateral con bario)	3	38.625	68924	82126.4
			resonancia nuclear magnetica de mama	1.25	0.96	295021	3540.25
			tomografia axial computada de abdomen y pelvis (abdomen total)	1.86	7.23	174298	23439.2
			tomografia axial computada de craneo simple	1.47	4.33	117075	7451.94
			tomografia axial computada de torax	1.86	6.62	129990	16005.9
			transaminasa glutámico pirúvica o alanino amino transferasa [tgp-alt]	3.52	47.12	12023	19941.6
			ultrasonografia de higado, pancreas, via biliar y vesicula	2.63	18.74	30237	14902.7
			ultrasonografía de abdomen total : higado, pancreas, vesicula, vias biliares, riñones, bazo, grandes vasos, pelvis y flancos	1.61	31.63	59246	30170.6
			ultrasonografia diagnostica de mama, con transductor de 7 mhz o mas	1.98	36.7	37698	27393.6
			xeromamografia o mamografia unilateral o de pieza quirurgica	2.09	70.53	54590	80469.9
		Total Seguimiento 3 a 5 años					655908
	Total RECAIDA SISTEMICA						1.37907e+08
